# Supplementary material for: dTGS: Method for Effective Components Identification from Traditional Chinese Medicine Formula and Mechanism Analysis
Source: Evid Based Complement Alternat Med. 2013 Dec 18;2013:840427. doi: 10.1155/2013/840427 (PMC3878852; doi:10.1155/2013/840427)
Supplement: Supplementary file 1 — Table S1： BHDWT network database Tables S2：19 chemical components and proteins affected by them [file 840427.f1.zip]

Archive with 3 entries (3 files):
- description.docx
- Table S1.xls
- Table S2.xls
