# Supplementary material for: dTGS: Method for Effective Components Identification from Traditional Chinese Medicine Formula and Mechanism Analysis
Source: Evid Based Complement Alternat Med. 2013 Dec 18;2013:840427. doi: 10.1155/2013/840427 (PMC3878852; doi:10.1155/2013/840427)
Supplement: Supplementary file 1 — Table S1： BHDWT network database Tables S2：19 chemical components and proteins affected by them [file 840427.f1.zip › Table S1.xls]

## Sheet: Sheet1
TCM	Chemical component	protein	protein code(uniprot)
gypsum	Calcium sulfate	WDR57	a0mnp2
gypsum	Calcium sulfate	DBX	o00571
gypsum	Calcium sulfate	MGAM	o43451
gypsum	Calcium sulfate	COX3	p00414
gypsum	Calcium sulfate	ENSG00000172680	p00540
gypsum	Calcium sulfate	APOH	p02749
gypsum	Calcium sulfate	SOD2	p04179
gypsum	Calcium sulfate	DBH	p09172
gypsum	Calcium sulfate	BMP2	p12643
gypsum	Calcium sulfate	BMP1	p13497
gypsum	Calcium sulfate	LIF	p15018
gypsum	Calcium sulfate	FST	p19883
gypsum	Calcium sulfate	ACRV1	p26436
gypsum	Calcium sulfate	MATII	p31153
gypsum	Calcium sulfate	CCT4	p50991
gypsum	Calcium sulfate	ZNF143	p52747
gypsum	Calcium sulfate	MARS	p56192
gypsum	Calcium sulfate	MAT1A	q00266
gypsum	Calcium sulfate	U2AF1	q01081
gypsum	Calcium sulfate	DHDDS	q86sq9
gypsum	Calcium sulfate	BOP	q8nb12
gypsum	Calcium sulfate	KY	q8nbh2
gypsum	Calcium sulfate	WRNIP1	q96s55
gypsum	Calcium sulfate	PSCD2	q99418
gypsum	Calcium sulfate	CDT1	q9h211
gypsum	Calcium sulfate	MIXL1	q9h2w2
gypsum	Calcium sulfate	LIME1	q9h400
gypsum	Calcium sulfate	CHST12	q9nrb3
gypsum	Calcium sulfate	TOPORS	q9ns56
gypsum	Calcium sulfate	DRD1IP	q9nyx4
gypsum	Calcium sulfate	AASS	q9udr5
gypsum	Calcium sulfate	POP2	q9uff9
anemarrhenae	Choline	SELI	c9j9i1
anemarrhenae	Choline	RTCD1	o00442
anemarrhenae	Choline	PAP-2a	o14494
anemarrhenae	Choline	PPAP2B	o14495
anemarrhenae	Choline	PLD2	o14939
anemarrhenae	Choline	MUSK	o15146
anemarrhenae	Choline	SLC22A2	o15244
anemarrhenae	Choline	SLC22A1	o15245
anemarrhenae	Choline	SUV39H1	o43463
anemarrhenae	Choline	PAP-2c	o43688
anemarrhenae	Choline	HSS	o60271
anemarrhenae	Choline	iPLA2	o60733
anemarrhenae	Choline	SLC22A3	o75751
anemarrhenae	Choline	SLC22A5	o76082
anemarrhenae	Choline	F2	p00734
anemarrhenae	Choline	CFD	p00746
anemarrhenae	Choline	REN	p00797
anemarrhenae	Choline	FOS	p01100
anemarrhenae	Choline	MYC	p01106
anemarrhenae	Choline	NGFB	p01138
anemarrhenae	Choline	OXT	p01178
anemarrhenae	Choline	PRL	p01236
anemarrhenae	Choline	GCG	p01275
anemarrhenae	Choline	INS	p01308
anemarrhenae	Choline	IGF2	p01344
anemarrhenae	Choline	APOE	p02649
anemarrhenae	Choline	CHRNA	p02708
anemarrhenae	Choline	PLA2	p04054
anemarrhenae	Choline	PME	p04080
anemarrhenae	Choline	NTRK1	p04629
anemarrhenae	Choline	P53	p04637
anemarrhenae	Choline	E1	p06276
anemarrhenae	Choline	CKM	p06732
anemarrhenae	Choline	TH	p07101
anemarrhenae	Choline	CHRNG	p07510
anemarrhenae	Choline	CHRM2	p08172
anemarrhenae	Choline	LCT	p09848
anemarrhenae	Choline	CHRM1	p11229
anemarrhenae	Choline	CHRNB1	p11230
anemarrhenae	Choline	IGF2R	p11717
anemarrhenae	Choline	CKMT1	p12532
anemarrhenae	Choline	CDH1	p12830
anemarrhenae	Choline	GPE	p15421
anemarrhenae	Choline	CKMT2	p17540
anemarrhenae	Choline	CHRNB2	p17787
anemarrhenae	Choline	RAB3A	p20336
anemarrhenae	Choline	PMCH	p20382
anemarrhenae	Choline	ABCB4	p21439
anemarrhenae	Choline	SYT1	p21579
anemarrhenae	Choline	SDHB	p21912
anemarrhenae	Choline	ACHE	p22303
anemarrhenae	Choline	GPT	p24298
anemarrhenae	Choline	S100A4	p26447
anemarrhenae	Choline	PDE4A	p27815
anemarrhenae	Choline	HTR1D	p28221
anemarrhenae	Choline	HTR1B	p28222
anemarrhenae	Choline	CHAT	p28329
anemarrhenae	Choline	GJB2	p29033
anemarrhenae	Choline	FMO3	p31513
anemarrhenae	Choline	CHRNA3	p32297
anemarrhenae	Choline	CDA	p32320
anemarrhenae	Choline	ABCD1	p33897
anemarrhenae	Choline	SAA4	p35542
anemarrhenae	Choline	CHKA	p35790
anemarrhenae	Choline	CHRNA7	p36544
anemarrhenae	Choline	CAT1	p43155
anemarrhenae	Choline	CHRNA4	p43681
anemarrhenae	Choline	PLA2G4A	p47712
anemarrhenae	Choline	ALDH9A1	p49189
anemarrhenae	Choline	CT	p49585
anemarrhenae	Choline	FHIT	p49789
anemarrhenae	Choline	SYB2	p63027
anemarrhenae	Choline	GPLD1	p80108
anemarrhenae	Choline	DCD	p81605
anemarrhenae	Choline	SLC25A3	q00325
anemarrhenae	Choline	NGFRAP1	q00994
anemarrhenae	Choline	CHRNE	q04844
anemarrhenae	Choline	CLC	q05315
anemarrhenae	Choline	GAD2	q05329
anemarrhenae	Choline	CHRNB3	q05901
anemarrhenae	Choline	CHRND	q07001
anemarrhenae	Choline	PPARA	q07869
anemarrhenae	Choline	PLD1	q13393
anemarrhenae	Choline	ATX	q13822
anemarrhenae	Choline	GNMT	q14749
anemarrhenae	Choline	KIAA0101	q15004
anemarrhenae	Choline	CHRNA2	q15822
anemarrhenae	Choline	CHRNA6	q15825
anemarrhenae	Choline	ETFQO	q16134
anemarrhenae	Choline	PCSK7	q16549
anemarrhenae	Choline	SLC18A3	q16572
anemarrhenae	Choline	PRG5	q32zl2
anemarrhenae	Choline	PHLDA2	q53ga4
anemarrhenae	Choline	NG22	q53gd3
anemarrhenae	Choline	PLA1A	q53h76
anemarrhenae	Choline	SMUG1	q53hv7
anemarrhenae	Choline	NAPEPLD	q6iq20
anemarrhenae	Choline	PLB	q6p1j6
anemarrhenae	Choline	EPGN	q6uw88
anemarrhenae	Choline	ENPP6	q6uwr7
anemarrhenae	Choline	Pptc	q86uu9
anemarrhenae	Choline	PLD3	q8iv08
anemarrhenae	Choline	CTL2	q8iwa5
anemarrhenae	Choline	SLC44A3	q8n4m1
anemarrhenae	Choline	CHDH	q8ne62
anemarrhenae	Choline	AYTL2	q8nf37
anemarrhenae	Choline	SGMS2	q8nhu3
anemarrhenae	Choline	PHOSPHO1	q8tct1
anemarrhenae	Choline	ALT2	q8td30
anemarrhenae	Choline	SLC44A1	q8wwi5
anemarrhenae	Choline	ROBO4	q8wz75
anemarrhenae	Choline	CLEC2B	q92478
anemarrhenae	Choline	CPT1B	q92523
anemarrhenae	Choline	BHMT	q93088
anemarrhenae	Choline	PLD4	q96bz4
anemarrhenae	Choline	PGLYRP2	q96pd5
anemarrhenae	Choline	VPS13A	q96rl7
anemarrhenae	Choline	MTR	q99707
anemarrhenae	Choline	CENPK	q9bs16
anemarrhenae	Choline	PTDSS2	q9bvg9
anemarrhenae	Choline	hCHT	q9gzv3
anemarrhenae	Choline	CHRNA10	q9gzz6
anemarrhenae	Choline	SLC22A4	q9h015
anemarrhenae	Choline	ETNK1	q9hbu6
anemarrhenae	Choline	GPAM	q9hcl2
anemarrhenae	Choline	ISYNA1	q9nph2
anemarrhenae	Choline	123F2	q9ns23
anemarrhenae	Choline	ETNK2	q9nvf9
anemarrhenae	Choline	PEMT	q9ubm1
anemarrhenae	Choline	dJ858B16.2	q9ug56
anemarrhenae	Choline	TES	q9ugi8
anemarrhenae	Choline	CHRNA9	q9ugm1
anemarrhenae	Choline	LGALS13	q9uhv8
anemarrhenae	Choline	DMGDH	q9ui17
anemarrhenae	Choline	SARDH	q9ul12
anemarrhenae	Choline	COLQ	q9y215
anemarrhenae	Choline	CHKB	q9y259
anemarrhenae	Choline	PCYT1B	q9y5k3
anemarrhenae	Choline	CEPT1	q9y6k0
anemarrhenae	Nicotinic acid	LEFTY2	o00292
anemarrhenae	Nicotinic acid	PNK	o00764
anemarrhenae	Nicotinic acid	APOL	o14791
anemarrhenae	Nicotinic acid	GDF8	o14793
anemarrhenae	Nicotinic acid	ADMR	o15218
anemarrhenae	Nicotinic acid	KMO	o15229
anemarrhenae	Nicotinic acid	SLC16A3	o15427
anemarrhenae	Nicotinic acid	ADCY6	o43306
anemarrhenae	Nicotinic acid	ENSG00000138031	o60266
anemarrhenae	Nicotinic acid	ADCY9	o60503
anemarrhenae	Nicotinic acid	WDR1	o75083
anemarrhenae	Nicotinic acid	LEFTY1	o75610
anemarrhenae	Nicotinic acid	DGAT1	o75907
anemarrhenae	Nicotinic acid	GG2-1	o95379
anemarrhenae	Nicotinic acid	APOM	o95445
anemarrhenae	Nicotinic acid	NADK	o95544
anemarrhenae	Nicotinic acid	ADCY5	o95622
anemarrhenae	Nicotinic acid	C6orf25	o95866
anemarrhenae	Nicotinic acid	GSR	p00390
anemarrhenae	Nicotinic acid	PNP	p00491
anemarrhenae	Nicotinic acid	GOT2	p00505
anemarrhenae	Nicotinic acid	LALBA	p00709
anemarrhenae	Nicotinic acid	HP	p00738
anemarrhenae	Nicotinic acid	ADA	p00813
anemarrhenae	Nicotinic acid	CED	p01137
anemarrhenae	Nicotinic acid	INS	p01308
anemarrhenae	Nicotinic acid	ENSG00000206328	p01375
anemarrhenae	Nicotinic acid	HBZ	p02008
anemarrhenae	Nicotinic acid	APOA1	p02647
anemarrhenae	Nicotinic acid	APOE	p02649
anemarrhenae	Nicotinic acid	APOA2	p02652
anemarrhenae	Nicotinic acid	APOC1	p02654
anemarrhenae	Nicotinic acid	APOC4	p02655
anemarrhenae	Nicotinic acid	APOC3	p02656
anemarrhenae	Nicotinic acid	FGA	p02671
anemarrhenae	Nicotinic acid	FGB	p02675
anemarrhenae	Nicotinic acid	FGG	p02679
anemarrhenae	Nicotinic acid	CRP	p02741
anemarrhenae	Nicotinic acid	LTF	p02788
anemarrhenae	Nicotinic acid	HMGCR	p04035
anemarrhenae	Nicotinic acid	CAT	p04040
anemarrhenae	Nicotinic acid	APOB	p04114
anemarrhenae	Nicotinic acid	SOD2	p04179
anemarrhenae	Nicotinic acid	APOD	p05090
anemarrhenae	Nicotinic acid	BB2	p05362
anemarrhenae	Nicotinic acid	CASB	p05814
anemarrhenae	Nicotinic acid	APOA4	p06727
anemarrhenae	Nicotinic acid	LPL	p06858
anemarrhenae	Nicotinic acid	CSN3	p07498
anemarrhenae	Nicotinic acid	APRT	p07741
anemarrhenae	Nicotinic acid	LPA	p08519
anemarrhenae	Nicotinic acid	HBQ1	p09105
anemarrhenae	Nicotinic acid	PARP1	p09874
anemarrhenae	Nicotinic acid	TGFB3	p10600
anemarrhenae	Nicotinic acid	CETP	p11597
anemarrhenae	Nicotinic acid	VEGFA	p15692
anemarrhenae	Nicotinic acid	CD31	p16284
anemarrhenae	Nicotinic acid	GOT1	p17174
anemarrhenae	Nicotinic acid	TCN2	p20062
anemarrhenae	Nicotinic acid	CD38	p28907
anemarrhenae	Nicotinic acid	TKT	p29401
anemarrhenae	Nicotinic acid	Cw*03	p30466
anemarrhenae	Nicotinic acid	CTH	p32929
anemarrhenae	Nicotinic acid	CD68	p34810
anemarrhenae	Nicotinic acid	OR1D2	p34982
anemarrhenae	Nicotinic acid	NOS	p35228
anemarrhenae	Nicotinic acid	PPARG	p37231
anemarrhenae	Nicotinic acid	ADCY8	p40145
anemarrhenae	Nicotinic acid	NNMT	p40261
anemarrhenae	Nicotinic acid	OBS	p41159
anemarrhenae	Nicotinic acid	PTGDS	p41222
anemarrhenae	Nicotinic acid	PAFAH1B1	p43034
anemarrhenae	Nicotinic acid	PBEF1	p43490
anemarrhenae	Nicotinic acid	HAAO	p46952
anemarrhenae	Nicotinic acid	CSN1	p47710
anemarrhenae	Nicotinic acid	TDO2	p48775
anemarrhenae	Nicotinic acid	HM74	p49019
anemarrhenae	Nicotinic acid	ADCY7	p51828
anemarrhenae	Nicotinic acid	HLP	p54257
anemarrhenae	Nicotinic acid	SST	p61278
anemarrhenae	Nicotinic acid	TGFB2	p61812
anemarrhenae	Nicotinic acid	PAFAH1B2	p68402
anemarrhenae	Nicotinic acid	EF7	p68871
anemarrhenae	Nicotinic acid	HBG2	p69892
anemarrhenae	Nicotinic acid	HBA1	p69905
anemarrhenae	Nicotinic acid	B94	q03169
anemarrhenae	Nicotinic acid	MFGE8	q08431
anemarrhenae	Nicotinic acid	ADCY2	q08462
anemarrhenae	Nicotinic acid	ADCY1	q08828
anemarrhenae	Nicotinic acid	BST1	q10588
anemarrhenae	Nicotinic acid	PLA2G7	q13093
anemarrhenae	Nicotinic acid	PTGDR	q13258
anemarrhenae	Nicotinic acid	APOF	q13790
anemarrhenae	Nicotinic acid	B61	q13829
anemarrhenae	Nicotinic acid	TFDP1	q14186
anemarrhenae	Nicotinic acid	FGL2	q14314
anemarrhenae	Nicotinic acid	NRC	q14686
anemarrhenae	Nicotinic acid	COG2	q14746
anemarrhenae	Nicotinic acid	PAFAH1B3	q15102
anemarrhenae	Nicotinic acid	QPRT	q15274
anemarrhenae	Nicotinic acid	MMD	q15546
anemarrhenae	Nicotinic acid	LCD1	q15582
anemarrhenae	Nicotinic acid	M7V1	q15758
anemarrhenae	Nicotinic acid	ADIPOQ	q15848
anemarrhenae	Nicotinic acid	LPAL2	q16609
anemarrhenae	Nicotinic acid	KYNU	q16719
anemarrhenae	Nicotinic acid	KIF19	q2tac6
anemarrhenae	Nicotinic acid	TNFAIP8L3	q5gj75
anemarrhenae	Nicotinic acid	ANGPT1	q5hya0
anemarrhenae	Nicotinic acid	RGAG4	q5hyw3
anemarrhenae	Nicotinic acid	MTHFR	q5snw6
anemarrhenae	Nicotinic acid	ENSG00000149962	q5syt8
anemarrhenae	Nicotinic acid	LIN9	q5tka1
anemarrhenae	Nicotinic acid	PPRC1	q5vv67
anemarrhenae	Nicotinic acid	KF	q63hm1
anemarrhenae	Nicotinic acid	SLC6A19	q695t7
anemarrhenae	Nicotinic acid	TNFAIP8L2	q6p589
anemarrhenae	Nicotinic acid	APOA5	q6q788
anemarrhenae	Nicotinic acid	PLXDC2	q6ux71
anemarrhenae	Nicotinic acid	NAPRT1	q6xqn6
anemarrhenae	Nicotinic acid	MOGAT3	q86vf5
anemarrhenae	Nicotinic acid	FRAS1	q86xx4
anemarrhenae	Nicotinic acid	SLC5A12	q8ius7
anemarrhenae	Nicotinic acid	SIR2L	q8ixj6
anemarrhenae	Nicotinic acid	SLC5A8	q8n695
anemarrhenae	Nicotinic acid	ALC	q8n6m5
anemarrhenae	Nicotinic acid	NGD	q8nej9
anemarrhenae	Nicotinic acid	ADCY4	q8nfm4
anemarrhenae	Nicotinic acid	WFDC5	q8tcv5
anemarrhenae	Nicotinic acid	NETO1	q8tdf5
anemarrhenae	Nicotinic acid	GPR109A	q8tds4
anemarrhenae	Nicotinic acid	ACMSD	q8tdx5
anemarrhenae	Nicotinic acid	TNFAIP8L1	q8wvp5
anemarrhenae	Nicotinic acid	HGB	q8wwm9
anemarrhenae	Nicotinic acid	WFDC12	q8wwy7
anemarrhenae	Nicotinic acid	SYNE2	q8wxh0
anemarrhenae	Nicotinic acid	FHR4	q92496
anemarrhenae	Nicotinic acid	NIS	q92911
anemarrhenae	Nicotinic acid	TMEM54	q969k7
anemarrhenae	Nicotinic acid	PNG	q96c90
anemarrhenae	Nicotinic acid	SIRT1	q96eb6
anemarrhenae	Nicotinic acid	DHTKD1	q96hy7
anemarrhenae	Nicotinic acid	SCLY	q96i15
anemarrhenae	Nicotinic acid	TNFAIP3	q96kp6
anemarrhenae	Nicotinic acid	UROC1	q96n76
anemarrhenae	Nicotinic acid	SLC6A18	q96n87
anemarrhenae	Nicotinic acid	DGAT2	q96pd7
anemarrhenae	Nicotinic acid	NOX5	q96ph1
anemarrhenae	Nicotinic acid	SLC22A12	q96s37
anemarrhenae	Nicotinic acid	NODAL	q96s42
anemarrhenae	Nicotinic acid	NMNAT3	q96t66
anemarrhenae	Nicotinic acid	PAFAH2	q99487
anemarrhenae	Nicotinic acid	APOL6	q9bww8
anemarrhenae	Nicotinic acid	GPR81	q9bxc0
anemarrhenae	Nicotinic acid	NTT5	q9gzn6
anemarrhenae	Nicotinic acid	ECT2	q9h8v3
anemarrhenae	Nicotinic acid	NMNAT1	q9han9
anemarrhenae	Nicotinic acid	NGB	q9npg2
anemarrhenae	Nicotinic acid	PNPO	q9nvs9
anemarrhenae	Nicotinic acid	C9orf95	q9nww6
anemarrhenae	Nicotinic acid	SIRT5	q9nxa8
anemarrhenae	Nicotinic acid	MSRA	q9uj68
anemarrhenae	Nicotinic acid	SLC22A13	q9y226
anemarrhenae	Nicotinic acid	NFS1	q9y697
anemarrhenae	Nicotinic acid	SLC4A4	q9y6r1
anemarrhenae	beta-Sitosterol	SOAT2	o75908
anemarrhenae	beta-Sitosterol	ABCA1	o95477
anemarrhenae	beta-Sitosterol	ADA	p00813
anemarrhenae	beta-Sitosterol	APOE	p02649
anemarrhenae	beta-Sitosterol	ESR1	p03372
anemarrhenae	beta-Sitosterol	HMGCR	p04035
anemarrhenae	beta-Sitosterol	APOB	p04114
anemarrhenae	beta-Sitosterol	BB2	p05362
anemarrhenae	beta-Sitosterol	GP1B	p07359
anemarrhenae	beta-Sitosterol	PARP1	p09874
anemarrhenae	beta-Sitosterol	MCAF	p13500
anemarrhenae	beta-Sitosterol	ENSG00000116171	p22307
anemarrhenae	beta-Sitosterol	CYP7A1	p22680
anemarrhenae	beta-Sitosterol	SOAT1	p35610
anemarrhenae	beta-Sitosterol	CASP3	p42574
anemarrhenae	beta-Sitosterol	NER	p55055
anemarrhenae	beta-Sitosterol	CASP9	p55211
anemarrhenae	beta-Sitosterol	CTX	q02318
anemarrhenae	beta-Sitosterol	SREBF2	q12772
anemarrhenae	beta-Sitosterol	LXR-a	q13133
anemarrhenae	beta-Sitosterol	Erb	q92731
anemarrhenae	beta-Sitosterol	IDI2	q9bxs1
anemarrhenae	beta-Sitosterol	ABCG8	q9h221
anemarrhenae	beta-Sitosterol	ABCG5	q9h222
anemarrhenae	beta-Sitosterol	NPC1L1	q9uhc9
anemarrhenae	beta-Sitosterol	CYP8B1	q9unu6
anemarrhenae	beta-Sitosterol	ENGL-a	q9y2c4
anemarrhenae	Mangiferin	HELT	a6nfd8
anemarrhenae	Mangiferin	PIK3C2A	o00443
anemarrhenae	Mangiferin	VILL	o15195
anemarrhenae	Mangiferin	INS	p01308
anemarrhenae	Mangiferin	ENSG00000206328	p01375
anemarrhenae	Mangiferin	CAT	p04040
anemarrhenae	Mangiferin	SOD2	p04179
anemarrhenae	Mangiferin	CYP1A2	p05177
anemarrhenae	Mangiferin	FBP1	p09467
anemarrhenae	Mangiferin	ENSG00000090402	p14410
anemarrhenae	Mangiferin	IDE	p14735
anemarrhenae	Mangiferin	ALDR1	p15121
anemarrhenae	Mangiferin	PNLIP	p16233
anemarrhenae	Mangiferin	POR	p16435
anemarrhenae	Mangiferin	PTGS1	p23219
anemarrhenae	Mangiferin	NOS	p35228
anemarrhenae	Mangiferin	PTGS2	p35354
anemarrhenae	Mangiferin	PPARG	p37231
anemarrhenae	Mangiferin	JNK2	p45984
anemarrhenae	Mangiferin	LEPR	p48357
anemarrhenae	Mangiferin	CACNA1B	q00975
anemarrhenae	Mangiferin	RELB	q01201
anemarrhenae	Mangiferin	GSTM4	q03013
anemarrhenae	Mangiferin	RELA	q04206
anemarrhenae	Mangiferin	PPARA	q07869
anemarrhenae	Mangiferin	RIPK1	q13546
anemarrhenae	Mangiferin	TRADD	q15628
anemarrhenae	Mangiferin	CACNA1E	q15878
anemarrhenae	Mangiferin	P3H3	q16538
anemarrhenae	Mangiferin	DECR	q16698
anemarrhenae	Mangiferin	ASPRV1	q53rt3
anemarrhenae	Mangiferin	ABL1	q59f19
anemarrhenae	Mangiferin	TAB1	q8izw2
anemarrhenae	Mangiferin	DHTKD1	q96hy7
anemarrhenae	Mangiferin	ZBTB20	q9hc78
anemarrhenae	Mangiferin	A1CF	q9nq94
anemarrhenae	Mangiferin	TRAF6	q9y4k3
anemarrhenae	Ginkgetin	ICMT	o60725
anemarrhenae	Ginkgetin	PTP4A3	o75365
anemarrhenae	Ginkgetin	PDE5A	o76074
anemarrhenae	Ginkgetin	IL1B	p01584
anemarrhenae	Ginkgetin	PLA2	p04054
anemarrhenae	Ginkgetin	SSB	p05455
anemarrhenae	Ginkgetin	DCN	p07585
anemarrhenae	Ginkgetin	PTGS1	p23219
anemarrhenae	Ginkgetin	NOS	p35228
anemarrhenae	Ginkgetin	PTGS2	p35354
anemarrhenae	Ginkgetin	PLA2G4A	p47712
anemarrhenae	Ginkgetin	ATQ1	p49419
anemarrhenae	Ginkgetin	NOS2	p60321
anemarrhenae	Ginkgetin	HTATIP	q92993
anemarrhenae	Nicotinamide	FAAH	o00519
anemarrhenae	Nicotinamide	BHLHB2	o14503
anemarrhenae	Nicotinamide	CED4	o14727
anemarrhenae	Nicotinamide	XPO1	o14980
anemarrhenae	Nicotinamide	MDM4	o15151
anemarrhenae	Nicotinamide	PPM1D	o15297
anemarrhenae	Nicotinamide	TP73	o15350
anemarrhenae	Nicotinamide	FAA	o15360
anemarrhenae	Nicotinamide	API4	o15392
anemarrhenae	Nicotinamide	FOXP2	o15409
anemarrhenae	Nicotinamide	SUV39H1	o43463
anemarrhenae	Nicotinamide	FOXO3A	o43524
anemarrhenae	Nicotinamide	SCO2	o43819
anemarrhenae	Nicotinamide	TBL1X	o60907
anemarrhenae	Nicotinamide	NOL3	o60936
anemarrhenae	Nicotinamide	TADA2L	o75478
anemarrhenae	Nicotinamide	TADA3L	o75528
anemarrhenae	Nicotinamide	PIAS2	o75928
anemarrhenae	Nicotinamide	MTA2	o94776
anemarrhenae	Nicotinamide	UBE4B	o95155
anemarrhenae	Nicotinamide	TIAF1	o95411
anemarrhenae	Nicotinamide	H6PD	o95479
anemarrhenae	Nicotinamide	NADK	o95544
anemarrhenae	Nicotinamide	D6D	o95864
anemarrhenae	Nicotinamide	EAP1	o95997
anemarrhenae	Nicotinamide	CHK2	o96017
anemarrhenae	Nicotinamide	PNP	p00491
anemarrhenae	Nicotinamide	REN	p00797
anemarrhenae	Nicotinamide	ALB	p02768
anemarrhenae	Nicotinamide	LTF	p02788
anemarrhenae	Nicotinamide	ND2	p03891
anemarrhenae	Nicotinamide	S100B	p04271
anemarrhenae	Nicotinamide	P53	p04637
anemarrhenae	Nicotinamide	HSF	p05231
anemarrhenae	Nicotinamide	HC2	p05546
anemarrhenae	Nicotinamide	RB1	p06400
anemarrhenae	Nicotinamide	GPI	p06744
anemarrhenae	Nicotinamide	PGK2	p07205
anemarrhenae	Nicotinamide	EPRS	p07814
anemarrhenae	Nicotinamide	SERPINF2	p08697
anemarrhenae	Nicotinamide	IBP1	p08833
anemarrhenae	Nicotinamide	PARP1	p09874
anemarrhenae	Nicotinamide	CTSA	p10619
anemarrhenae	Nicotinamide	HSPA5	p11021
anemarrhenae	Nicotinamide	G6PD	p11413
anemarrhenae	Nicotinamide	ML8	p12956
anemarrhenae	Nicotinamide	COX4	p13073
anemarrhenae	Nicotinamide	VCAN	p13611
anemarrhenae	Nicotinamide	P4HA1	p13674
anemarrhenae	Nicotinamide	GFAP	p14136
anemarrhenae	Nicotinamide	H2AFX	p16104
anemarrhenae	Nicotinamide	PTPN1	p18031
anemarrhenae	Nicotinamide	PAM	p19021
anemarrhenae	Nicotinamide	HOX1C	p20719
anemarrhenae	Nicotinamide	COMT	p21964
anemarrhenae	Nicotinamide	TGM2	p21980
anemarrhenae	Nicotinamide	XPA	p23025
anemarrhenae	Nicotinamide	SLC6A2	p23975
anemarrhenae	Nicotinamide	GUC2C	p25092
anemarrhenae	Nicotinamide	DNMT1	p26358
anemarrhenae	Nicotinamide	IVD	p26440
anemarrhenae	Nicotinamide	S100A4	p26447
anemarrhenae	Nicotinamide	NMBR	p28336
anemarrhenae	Nicotinamide	CD38	p28907
anemarrhenae	Nicotinamide	TKT	p29401
anemarrhenae	Nicotinamide	ENSG00000164867	p29474
anemarrhenae	Nicotinamide	CDC25C	p30307
anemarrhenae	Nicotinamide	P5C	p32322
anemarrhenae	Nicotinamide	MCM7	p33993
anemarrhenae	Nicotinamide	ENSG00000188822	p34972
anemarrhenae	Nicotinamide	NOS	p35228
anemarrhenae	Nicotinamide	TALDO1	p37837
anemarrhenae	Nicotinamide	CDKN1A	p38936
anemarrhenae	Nicotinamide	NNMT	p40261
anemarrhenae	Nicotinamide	OPRD1	p41143
anemarrhenae	Nicotinamide	PBEF1	p43490
anemarrhenae	Nicotinamide	JNK2	p45984
anemarrhenae	Nicotinamide	RECQL	p46063
anemarrhenae	Nicotinamide	CSN1	p47710
anemarrhenae	Nicotinamide	FASLG	p48023
anemarrhenae	Nicotinamide	NUMB	p49757
anemarrhenae	Nicotinamide	MRE11A	p49959
anemarrhenae	Nicotinamide	PGD	p52209
anemarrhenae	Nicotinamide	ENSG00000159399	p52789
anemarrhenae	Nicotinamide	ART1	p52961
anemarrhenae	Nicotinamide	PBF	p53801
anemarrhenae	Nicotinamide	BF1	p55316
anemarrhenae	Nicotinamide	IL2	p60568
anemarrhenae	Nicotinamide	ERVK6	p61567
anemarrhenae	Nicotinamide	HIST1H4A	p62805
anemarrhenae	Nicotinamide	HNRPU	q00839
anemarrhenae	Nicotinamide	RNF31	q00978
anemarrhenae	Nicotinamide	HDM2	q00987
anemarrhenae	Nicotinamide	DAT1	q01959
anemarrhenae	Nicotinamide	PGBD3	q03468
anemarrhenae	Nicotinamide	ZBTB16	q05516
anemarrhenae	Nicotinamide	BAX	q07812
anemarrhenae	Nicotinamide	MCL1	q07820
anemarrhenae	Nicotinamide	SSRP1	q08945
anemarrhenae	Nicotinamide	BST1	q10588
anemarrhenae	Nicotinamide	FOXO1A	q12778
anemarrhenae	Nicotinamide	TP53BP1	q12888
anemarrhenae	Nicotinamide	XRCC4	q13426
anemarrhenae	Nicotinamide	ROCK1	q13464
anemarrhenae	Nicotinamide	TNK1	q13470
anemarrhenae	Nicotinamide	ART3	q13508
anemarrhenae	Nicotinamide	dod	q13526
anemarrhenae	Nicotinamide	HDAC1	q13547
anemarrhenae	Nicotinamide	LARS2	q15031
anemarrhenae	Nicotinamide	SETDB1	q15047
anemarrhenae	Nicotinamide	PPA1	q15181
anemarrhenae	Nicotinamide	QPRT	q15274
anemarrhenae	Nicotinamide	Hua	q15717
anemarrhenae	Nicotinamide	ADIPOQ	q15848
anemarrhenae	Nicotinamide	SGCB	q16585
anemarrhenae	Nicotinamide	BAK1	q16611
anemarrhenae	Nicotinamide	DECR	q16698
anemarrhenae	Nicotinamide	P89	q16891
anemarrhenae	Nicotinamide	ACSM3	q53fz2
anemarrhenae	Nicotinamide	ANKRD57	q53lp3
anemarrhenae	Nicotinamide	ENSG00000149962	q5syt8
anemarrhenae	Nicotinamide	FAAH2	q6gmr7
anemarrhenae	Nicotinamide	NADSYN1	q6ia69
anemarrhenae	Nicotinamide	NAPRT1	q6xqn6
anemarrhenae	Nicotinamide	MON1B	q7l1v2
anemarrhenae	Nicotinamide	ACOT1	q86tx2
anemarrhenae	Nicotinamide	RPS19BP1	q86wx3
anemarrhenae	Nicotinamide	CARM1	q86x55
anemarrhenae	Nicotinamide	ERO1LB	q86yb8
anemarrhenae	Nicotinamide	SIR2L	q8ixj6
anemarrhenae	Nicotinamide	SIRT6	q8n6t7
anemarrhenae	Nicotinamide	ZADH1	q8n8n7
anemarrhenae	Nicotinamide	VR1	q8ner1
anemarrhenae	Nicotinamide	TRPV3	q8net8
anemarrhenae	Nicotinamide	GPR109A	q8tds4
anemarrhenae	Nicotinamide	GPR119	q8tdv5
anemarrhenae	Nicotinamide	HDAC7	q8wui4
anemarrhenae	Nicotinamide	PALLD	q8wx93
anemarrhenae	Nicotinamide	DYRK2	q92630
anemarrhenae	Nicotinamide	USP7	q93009
anemarrhenae	Nicotinamide	ART4	q93070
anemarrhenae	Nicotinamide	Teap	q96a56
anemarrhenae	Nicotinamide	SIRT1	q96eb6
anemarrhenae	Nicotinamide	ERO1L	q96he7
anemarrhenae	Nicotinamide	ART5	q96l15
anemarrhenae	Nicotinamide	NOX5	q96ph1
anemarrhenae	Nicotinamide	SMG1	q96q15
anemarrhenae	Nicotinamide	AE4	q96q91
anemarrhenae	Nicotinamide	NMNAT3	q96t66
anemarrhenae	Nicotinamide	ANM1	q99873
anemarrhenae	Nicotinamide	HNRPUL1	q9buj2
anemarrhenae	Nicotinamide	BBC3	q9bxh1
anemarrhenae	Nicotinamide	NMNAT2	q9bzq4
anemarrhenae	Nicotinamide	C1orf128	q9gzp4
anemarrhenae	Nicotinamide	NAT13	q9gzz1
anemarrhenae	Nicotinamide	HIPK2	q9h2x6
anemarrhenae	Nicotinamide	KET	q9h3d4
anemarrhenae	Nicotinamide	TPK1	q9h3s4
anemarrhenae	Nicotinamide	MOF	q9h7z6
anemarrhenae	Nicotinamide	NMNAT1	q9han9
anemarrhenae	Nicotinamide	TRPV4	q9hba0
anemarrhenae	Nicotinamide	P53AIP1	q9hcn2
anemarrhenae	Nicotinamide	FAM60A	q9np50
anemarrhenae	Nicotinamide	TRPV5	q9nqa5
anemarrhenae	Nicotinamide	SMYD2	q9nrg4
anemarrhenae	Nicotinamide	LATS2	q9nrm7
anemarrhenae	Nicotinamide	METTL5	q9nrn9
anemarrhenae	Nicotinamide	SIRT3	q9ntg7
anemarrhenae	Nicotinamide	SIRT5	q9nxa8
anemarrhenae	Nicotinamide	TREM2	q9nzc2
anemarrhenae	Nicotinamide	NDOR1	q9uhb4
anemarrhenae	Nicotinamide	RASD1	q9y272
anemarrhenae	Nicotinamide	FACT	q9y5b9
anemarrhenae	Nicotinamide	TRPV2	q9y5s1
anemarrhenae	Nicotinamide	SMRT	q9y618
anemarrhenae	Nicotinamide	SIRT4	q9y6e7
anemarrhenae	Anemarrhenasaponin-Ia	ENSG00000117525	p13726
anemarrhenae	Anemarrhenasaponin-Ia	CACNA1E	q15878
anemarrhenae	Anemarsaponin B	KIAA0101	q15004
anemarrhenae	Anemarsaponin B	CACNA1E	q15878
anemarrhenae	Anemarsaponin C	ARNTL	o00327
anemarrhenae	Anemarsaponin C	CACNA1B	q00975
anemarrhenae	Anemarsaponin C	CACNA1E	q15878
anemarrhenae	Anemarsaponin F	CHRM2	p08172
anemarrhenae	Anemarsaponin F	CHRM1	p11229
anemarrhenae	CTHD0233276-1	ARNTL	o00327
anemarrhenae	CTHD0233276-1	CACNA1B	q00975
anemarrhenae	CTHD0233276-1	CACNA1E	q15878
anemarrhenae	CTHD0233276-20	ARNTL	o00327
anemarrhenae	CTHD0233276-20	CACNA1B	q00975
anemarrhenae	CTHD0233276-20	CACNA1E	q15878
anemarrhenae	cis-Hinokiresinol	FGF2	p09038
anemarrhenae	cis-Hinokiresinol	PDE4A	p27815
anemarrhenae	cis-Hinokiresinol	CTRL	p40313
anemarrhenae	cis-Hinokiresinol	SSR1	p43307
anemarrhenae	cis-Hinokiresinol	FIC	p80098
anemarrhenae	cis-Hinokiresinol	FRMD7	q6zut3
anemarrhenae	cis-Hinokiresinol	PDZD4	q76g19
anemarrhenae	Markogenin	GH1	p01241
anemarrhenae	Markogenin	GLUC	q9h227
anemarrhenae	Neogitogenin	GH1	p01241
anemarrhenae	Neogitogenin	GLUC	q9h227
anemarrhenae	Sarsasapogenin	GP1B	p07359
anemarrhenae	Sarsasapogenin	PARP1	p09874
anemarrhenae	Sarsasapogenin	CASP3	p42574
anemarrhenae	Sarsasapogenin	PBEF1	p43490
anemarrhenae	Sarsasapogenin	MAPK8	p45983
anemarrhenae	Sarsasapogenin	DEFA1	p59665
anemarrhenae	Sarsasapogenin	SLC35A2	p78381
anemarrhenae	Sarsasapogenin	CYCS	p99999
anemarrhenae	Sarsasapogenin	RUNX2	q13950
anemarrhenae	Sarsasapogenin	ATG6	q14457
anemarrhenae	Sarsasapogenin	RGN	q15493
anemarrhenae	Sarsasapogenin	ENSG00000149962	q5syt8
anemarrhenae	Sarsasapogenin	UGT1A5	q9haw9
anemarrhenae	Sarsasapogenin	FU	q9nrp7
anemarrhenae	Smilagenin	GP1B	p07359
anemarrhenae	Smilagenin	PARP1	p09874
anemarrhenae	Smilagenin	CASP3	p42574
anemarrhenae	Smilagenin	PBEF1	p43490
anemarrhenae	Smilagenin	MAPK8	p45983
anemarrhenae	Smilagenin	DEFA1	p59665
anemarrhenae	Smilagenin	SLC35A2	p78381
anemarrhenae	Smilagenin	CYCS	p99999
anemarrhenae	Smilagenin	RUNX2	q13950
anemarrhenae	Smilagenin	ATG6	q14457
anemarrhenae	Smilagenin	RGN	q15493
anemarrhenae	Smilagenin	ENSG00000149962	q5syt8
anemarrhenae	Smilagenin	UGT1A5	q9haw9
anemarrhenae	Smilagenin	FU	q9nrp7
anemarrhenae	Timobiose	FOR	a8k5i5
anemarrhenae	Timobiose	LAD1	o00515
anemarrhenae	Timobiose	PYGL	p06737
anemarrhenae	Timobiose	GUSB	p08236
anemarrhenae	Timobiose	PYGB	p11216
anemarrhenae	Timobiose	PYGM	p11217
anemarrhenae	Timobiose	HKE5	p13942
anemarrhenae	Timobiose	GLB1	p16278
anemarrhenae	Timobiose	HDEL	p24390
anemarrhenae	Timobiose	NFYB	p25208
anemarrhenae	Timobiose	ENSG00000178464	p27635
anemarrhenae	Timobiose	GJA8	p48165
anemarrhenae	Timobiose	LBA	p50851
anemarrhenae	Timobiose	GALK	p51570
anemarrhenae	Timobiose	GALK2	q01415
anemarrhenae	Timobiose	AES	q08117
anemarrhenae	Timobiose	RBL2	q08999
anemarrhenae	Timobiose	NFYC	q13952
anemarrhenae	Timobiose	LCTL	q6uwm7
anemarrhenae	Timobiose	SCN2A	q99250
anemarrhenae	Timobiose	GLUC	q9h227
anemarrhenae	Timobiose	KLK15	q9h2r5
anemarrhenae	Timobiose	ISYNA1	q9nph2
anemarrhenae	Timobiose	ENSG00000137311	q9uig4
anemarrhenae	Timosaponin A-III	ARNTL	o00327
anemarrhenae	Timosaponin A-III	ENSG00000170312	p06493
anemarrhenae	Timosaponin A-III	CDK4	p11802
anemarrhenae	Timosaponin A-III	CCNA2	p20248
anemarrhenae	Timosaponin A-III	CASP3	p42574
anemarrhenae	Timosaponin A-III	CASP9	p55211
anemarrhenae	Timosaponin A-III	CCNA1	p78396
anemarrhenae	Timosaponin A-III	CACNA1B	q00975
anemarrhenae	Timosaponin A-III	BAX	q07812
anemarrhenae	Timosaponin A-III	MCH5	q14790
anemarrhenae	Timosaponin A-III	CACNA1E	q15878
anemarrhenae	Xilingsaponin B	ARNTL	o00327
anemarrhenae	Xilingsaponin B	CACNA1B	q00975
anemarrhenae	Xilingsaponin B	CACNA1E	q15878
rehmannia dride rhizome	Hexadecanoic acid	ENSG00000206329	a2arm6
rehmannia dride rhizome	Hexadecanoic acid	MED25	b3kp71
rehmannia dride rhizome	Hexadecanoic acid	DNL	o00115
rehmannia dride rhizome	Hexadecanoic acid	ADPS	o00116
rehmannia dride rhizome	Hexadecanoic acid	ACOT7	o00154
rehmannia dride rhizome	Hexadecanoic acid	PDHX	o00330
rehmannia dride rhizome	Hexadecanoic acid	ACACB	o00763
rehmannia dride rhizome	Hexadecanoic acid	SCD	o00767
rehmannia dride rhizome	Hexadecanoic acid	PAP-2a	o14494
rehmannia dride rhizome	Hexadecanoic acid	PPAP2B	o14495
rehmannia dride rhizome	Hexadecanoic acid	NDUFAB1	o14561
rehmannia dride rhizome	Hexadecanoic acid	FFAR1	o14842
rehmannia dride rhizome	Hexadecanoic acid	GNPAT	o15228
rehmannia dride rhizome	Hexadecanoic acid	ACOX3	o15254
rehmannia dride rhizome	Hexadecanoic acid	FABP7	o15540
rehmannia dride rhizome	Hexadecanoic acid	SYT7	o43581
rehmannia dride rhizome	Hexadecanoic acid	TRAPPC3	o43617
rehmannia dride rhizome	Hexadecanoic acid	PAP-2c	o43688
rehmannia dride rhizome	Hexadecanoic acid	CAC	o43772
rehmannia dride rhizome	Hexadecanoic acid	ACSL4	o60488
rehmannia dride rhizome	Hexadecanoic acid	GREM1	o60565
rehmannia dride rhizome	Hexadecanoic acid	CS	o75390
rehmannia dride rhizome	Hexadecanoic acid	IRE1	o75460
rehmannia dride rhizome	Hexadecanoic acid	PALM	o75781
rehmannia dride rhizome	Hexadecanoic acid	IDH1	o75874
rehmannia dride rhizome	Hexadecanoic acid	DGAT1	o75907
rehmannia dride rhizome	Hexadecanoic acid	SEC14L2	o76054
rehmannia dride rhizome	Hexadecanoic acid	LRAT	o95237
rehmannia dride rhizome	Hexadecanoic acid	ACSL3	o95573
rehmannia dride rhizome	Hexadecanoic acid	MCD	o95822
rehmannia dride rhizome	Hexadecanoic acid	D6D	o95864
rehmannia dride rhizome	Hexadecanoic acid	CYB5A	p00167
rehmannia dride rhizome	Hexadecanoic acid	GOT2	p00505
rehmannia dride rhizome	Hexadecanoic acid	REN	p00797
rehmannia dride rhizome	Hexadecanoic acid	C3	p01024
rehmannia dride rhizome	Hexadecanoic acid	FOS	p01100
rehmannia dride rhizome	Hexadecanoic acid	GCG	p01275
rehmannia dride rhizome	Hexadecanoic acid	INS	p01308
rehmannia dride rhizome	Hexadecanoic acid	ALB	p02768
rehmannia dride rhizome	Hexadecanoic acid	CAT	p04040
rehmannia dride rhizome	Hexadecanoic acid	PLA2	p04054
rehmannia dride rhizome	Hexadecanoic acid	APOB	p04114
rehmannia dride rhizome	Hexadecanoic acid	EIF2S1	p05198
rehmannia dride rhizome	Hexadecanoic acid	FABP3	p05413
rehmannia dride rhizome	Hexadecanoic acid	UROD	p06132
rehmannia dride rhizome	Hexadecanoic acid	INSR	p06213
rehmannia dride rhizome	Hexadecanoic acid	FYN	p06241
rehmannia dride rhizome	Hexadecanoic acid	ENSG00000166278	p06681
rehmannia dride rhizome	Hexadecanoic acid	S100A6	p06703
rehmannia dride rhizome	Hexadecanoic acid	LPL	p06858
rehmannia dride rhizome	Hexadecanoic acid	FABP1	p07148
rehmannia dride rhizome	Hexadecanoic acid	TRY1	p07477
rehmannia dride rhizome	Hexadecanoic acid	TRY2	p07478
rehmannia dride rhizome	Hexadecanoic acid	SP-B	p07988
rehmannia dride rhizome	Hexadecanoic acid	RHO	p08100
rehmannia dride rhizome	Hexadecanoic acid	PFKM	p08237
rehmannia dride rhizome	Hexadecanoic acid	PDHA1	p08559
rehmannia dride rhizome	Hexadecanoic acid	ACAA1	p09110
rehmannia dride rhizome	Hexadecanoic acid	RBP1	p09455
rehmannia dride rhizome	Hexadecanoic acid	PAEP	p09466
rehmannia dride rhizome	Hexadecanoic acid	ENSG00000072444	p0c7u2
rehmannia dride rhizome	Hexadecanoic acid	K60	p10145
rehmannia dride rhizome	Hexadecanoic acid	BCL2	p10415
rehmannia dride rhizome	Hexadecanoic acid	CYP2C8	p10632
rehmannia dride rhizome	Hexadecanoic acid	GLUT2	p11168
rehmannia dride rhizome	Hexadecanoic acid	ACADM	p11310
rehmannia dride rhizome	Hexadecanoic acid	PC	p11498
rehmannia dride rhizome	Hexadecanoic acid	CETP	p11597
rehmannia dride rhizome	Hexadecanoic acid	SP-C	p11686
rehmannia dride rhizome	Hexadecanoic acid	FABP2	p12104
rehmannia dride rhizome	Hexadecanoic acid	ETFA	p13804
rehmannia dride rhizome	Hexadecanoic acid	GYS	p13807
rehmannia dride rhizome	Hexadecanoic acid	SLC2A4	p14672
rehmannia dride rhizome	Hexadecanoic acid	FABP4	p15090
rehmannia dride rhizome	Hexadecanoic acid	PNLIP	p16233
rehmannia dride rhizome	Hexadecanoic acid	GP4	p16671
rehmannia dride rhizome	Hexadecanoic acid	XBP1	p17861
rehmannia dride rhizome	Hexadecanoic acid	CEL	p19835
rehmannia dride rhizome	Hexadecanoic acid	KBF1	p19838
rehmannia dride rhizome	Hexadecanoic acid	ALOX5AP	p20292
rehmannia dride rhizome	Hexadecanoic acid	TRH	p20396
rehmannia dride rhizome	Hexadecanoic acid	ENSG00000116171	p22307
rehmannia dride rhizome	Hexadecanoic acid	N10	p22736
rehmannia dride rhizome	Hexadecanoic acid	CEH	p23141
rehmannia dride rhizome	Hexadecanoic acid	CPT2	p23786
rehmannia dride rhizome	Hexadecanoic acid	UCP	p25874
rehmannia dride rhizome	Hexadecanoic acid	ACADL	p28330
rehmannia dride rhizome	Hexadecanoic acid	NMT	p30419
rehmannia dride rhizome	Hexadecanoic acid	LCN1	p31025
rehmannia dride rhizome	Hexadecanoic acid	AKT1	p31749
rehmannia dride rhizome	Hexadecanoic acid	ATIC	p31939
rehmannia dride rhizome	Hexadecanoic acid	ACSL1	p33121
rehmannia dride rhizome	Hexadecanoic acid	ABCD1	p33897
rehmannia dride rhizome	Hexadecanoic acid	GALNS	p34059
rehmannia dride rhizome	Hexadecanoic acid	PRSS3	p35030
rehmannia dride rhizome	Hexadecanoic acid	CTNNB	p35222
rehmannia dride rhizome	Hexadecanoic acid	NOS	p35228
rehmannia dride rhizome	Hexadecanoic acid	PCK1	p35558
rehmannia dride rhizome	Hexadecanoic acid	IRS1	p35568
rehmannia dride rhizome	Hexadecanoic acid	DDIT3	p35638
rehmannia dride rhizome	Hexadecanoic acid	SREBF1	p36956
rehmannia dride rhizome	Hexadecanoic acid	PPARG	p37231
rehmannia dride rhizome	Hexadecanoic acid	ETFB	p38117
rehmannia dride rhizome	Hexadecanoic acid	HADHA	p40939
rehmannia dride rhizome	Hexadecanoic acid	OBS	p41159
rehmannia dride rhizome	Hexadecanoic acid	CASP3	p42574
rehmannia dride rhizome	Hexadecanoic acid	CAT1	p43155
rehmannia dride rhizome	Hexadecanoic acid	PLA2G4A	p47712
rehmannia dride rhizome	Hexadecanoic acid	ZFP36L2	p47974
rehmannia dride rhizome	Hexadecanoic acid	FASN	p49327
rehmannia dride rhizome	Hexadecanoic acid	ACADVL	p49748
rehmannia dride rhizome	Hexadecanoic acid	ACOT2	p49753
rehmannia dride rhizome	Hexadecanoic acid	CPT1A	p50416
rehmannia dride rhizome	Hexadecanoic acid	PPT1	p50897
rehmannia dride rhizome	Hexadecanoic acid	ILBP	p51161
rehmannia dride rhizome	Hexadecanoic acid	GYS2	p54840
rehmannia dride rhizome	Hexadecanoic acid	MTP	p55157
rehmannia dride rhizome	Hexadecanoic acid	CASP6	p55212
rehmannia dride rhizome	Hexadecanoic acid	UCP2	p55851
rehmannia dride rhizome	Hexadecanoic acid	UCP3	p55916
rehmannia dride rhizome	Hexadecanoic acid	WNT3A	p56704
rehmannia dride rhizome	Hexadecanoic acid	GJA9	p57773
rehmannia dride rhizome	Hexadecanoic acid	NOS2	p60321
rehmannia dride rhizome	Hexadecanoic acid	PTEN	p60484
rehmannia dride rhizome	Hexadecanoic acid	SNAP25	p60880
rehmannia dride rhizome	Hexadecanoic acid	B2M	p61769
rehmannia dride rhizome	Hexadecanoic acid	CYCS	p99999
rehmannia dride rhizome	Hexadecanoic acid	NFKB2	q00653
rehmannia dride rhizome	Hexadecanoic acid	RELB	q01201
rehmannia dride rhizome	Hexadecanoic acid	ENSG00000166899	q01469
rehmannia dride rhizome	Hexadecanoic acid	CYP4A11	q02928
rehmannia dride rhizome	Hexadecanoic acid	CAV1	q03135
rehmannia dride rhizome	Hexadecanoic acid	RELA	q04206
rehmannia dride rhizome	Hexadecanoic acid	PRKCQ	q04759
rehmannia dride rhizome	Hexadecanoic acid	HSL	q05469
rehmannia dride rhizome	Hexadecanoic acid	GPAT	q06203
rehmannia dride rhizome	Hexadecanoic acid	BAX	q07812
rehmannia dride rhizome	Hexadecanoic acid	PPARA	q07869
rehmannia dride rhizome	Hexadecanoic acid	FOXM1	q08050
rehmannia dride rhizome	Hexadecanoic acid	ACC	q13085
rehmannia dride rhizome	Hexadecanoic acid	SCARB2	q14108
rehmannia dride rhizome	Hexadecanoic acid	BTG3	q14201
rehmannia dride rhizome	Hexadecanoic acid	HNF4G	q14541
rehmannia dride rhizome	Hexadecanoic acid	IRF3	q14653
rehmannia dride rhizome	Hexadecanoic acid	ACOX1	q15067
rehmannia dride rhizome	Hexadecanoic acid	ADIPOQ	q15848
rehmannia dride rhizome	Hexadecanoic acid	PCSK7	q16549
rehmannia dride rhizome	Hexadecanoic acid	PDK4	q16654
rehmannia dride rhizome	Hexadecanoic acid	DECR	q16698
rehmannia dride rhizome	Hexadecanoic acid	PCK2	q16822
rehmannia dride rhizome	Hexadecanoic acid	PRG5	q32zl2
rehmannia dride rhizome	Hexadecanoic acid	PLA1A	q53h76
rehmannia dride rhizome	Hexadecanoic acid	BET3L	q5t215
rehmannia dride rhizome	Hexadecanoic acid	LIN9	q5tka1
rehmannia dride rhizome	Hexadecanoic acid	ACAD10	q6jqn1
rehmannia dride rhizome	Hexadecanoic acid	SLC27A4	q6p1m0
rehmannia dride rhizome	Hexadecanoic acid	GOLGA7	q7z5g4
rehmannia dride rhizome	Hexadecanoic acid	SCD5	q86sk9
rehmannia dride rhizome	Hexadecanoic acid	ACOT1	q86tx2
rehmannia dride rhizome	Hexadecanoic acid	CASZ1	q86v15
rehmannia dride rhizome	Hexadecanoic acid	HYPH	q8iuh5
rehmannia dride rhizome	Hexadecanoic acid	CYP4Z2P	q8n1l4
rehmannia dride rhizome	Hexadecanoic acid	ACBD7	q8n6n7
rehmannia dride rhizome	Hexadecanoic acid	ACOT4	q8n9l9
rehmannia dride rhizome	Hexadecanoic acid	FANCB	q8nb91
rehmannia dride rhizome	Hexadecanoic acid	AYTL2	q8nf37
rehmannia dride rhizome	Hexadecanoic acid	CPT1C	q8tcg5
rehmannia dride rhizome	Hexadecanoic acid	NETO1	q8tdf5
rehmannia dride rhizome	Hexadecanoic acid	MLSTD2	q8wvx9
rehmannia dride rhizome	Hexadecanoic acid	CPT1B	q92523
rehmannia dride rhizome	Hexadecanoic acid	PLEKHG5	q93038
rehmannia dride rhizome	Hexadecanoic acid	SYTL4	q96c24
rehmannia dride rhizome	Hexadecanoic acid	SLC27A1	q96dy3
rehmannia dride rhizome	Hexadecanoic acid	IKBR	q96ha7
rehmannia dride rhizome	Hexadecanoic acid	MLSTD1	q96k12
rehmannia dride rhizome	Hexadecanoic acid	TNFAIP3	q96kp6
rehmannia dride rhizome	Hexadecanoic acid	NOX5	q96ph1
rehmannia dride rhizome	Hexadecanoic acid	GDF15	q99988
rehmannia dride rhizome	Hexadecanoic acid	ABHD6	q9bv23
rehmannia dride rhizome	Hexadecanoic acid	SIGLEC1	q9bzz2
rehmannia dride rhizome	Hexadecanoic acid	GLUC	q9h227
rehmannia dride rhizome	Hexadecanoic acid	GPAM	q9hcl2
rehmannia dride rhizome	Hexadecanoic acid	ASAH2	q9nr71
rehmannia dride rhizome	Hexadecanoic acid	PIGV	q9nud9
rehmannia dride rhizome	Hexadecanoic acid	OLAH	q9nv23
rehmannia dride rhizome	Hexadecanoic acid	PEK	q9nzj5
rehmannia dride rhizome	Hexadecanoic acid	PPM2C	q9p0j1
rehmannia dride rhizome	Hexadecanoic acid	CALCOCO1	q9p1z2
rehmannia dride rhizome	Hexadecanoic acid	GPR77	q9p296
rehmannia dride rhizome	Hexadecanoic acid	ACSL6	q9uku0
rehmannia dride rhizome	Hexadecanoic acid	ACSL5	q9ulc5
rehmannia dride rhizome	Hexadecanoic acid	TRAPPC4	q9y296
rehmannia dride rhizome	Hexadecanoic acid	ZDHHC9	q9y397
rehmannia dride rhizome	Hexadecanoic acid	TRAPPC1	q9y5r8
rehmannia dride rhizome	Adenosine	TK2	o00142
rehmannia dride rhizome	Adenosine	CNT1	o00337
rehmannia dride rhizome	Adenosine	FHM	o00555
rehmannia dride rhizome	Adenosine	PAP-2a	o14494
rehmannia dride rhizome	Adenosine	PPAP2B	o14495
rehmannia dride rhizome	Adenosine	SDHD	o14521
rehmannia dride rhizome	Adenosine	AURKA	o14965
rehmannia dride rhizome	Adenosine	MAPK13	o15264
rehmannia dride rhizome	Adenosine	ADCY6	o43306
rehmannia dride rhizome	Adenosine	MAP3K7	o43318
rehmannia dride rhizome	Adenosine	MGAM	o43451
rehmannia dride rhizome	Adenosine	HCRT	o43612
rehmannia dride rhizome	Adenosine	PAP-2c	o43688
rehmannia dride rhizome	Adenosine	CALU	o43852
rehmannia dride rhizome	Adenosine	AHCYL1	o43865
rehmannia dride rhizome	Adenosine	SLC28A2	o43868
rehmannia dride rhizome	Adenosine	ENSG00000138031	o60266
rehmannia dride rhizome	Adenosine	ADCY9	o60503
rehmannia dride rhizome	Adenosine	TADA2L	o75478
rehmannia dride rhizome	Adenosine	SF3B1	o75533
rehmannia dride rhizome	Adenosine	PXE	o95255
rehmannia dride rhizome	Adenosine	ABCA1	o95477
rehmannia dride rhizome	Adenosine	ADCY5	o95622
rehmannia dride rhizome	Adenosine	LDHA	p00338
rehmannia dride rhizome	Adenosine	PNP	p00491
rehmannia dride rhizome	Adenosine	HPRT1	p00492
rehmannia dride rhizome	Adenosine	AK1	p00568
rehmannia dride rhizome	Adenosine	F2	p00734
rehmannia dride rhizome	Adenosine	REN	p00797
rehmannia dride rhizome	Adenosine	ADA	p00813
rehmannia dride rhizome	Adenosine	NGFB	p01138
rehmannia dride rhizome	Adenosine	NPPA	p01160
rehmannia dride rhizome	Adenosine	OXT	p01178
rehmannia dride rhizome	Adenosine	AVP	p01185
rehmannia dride rhizome	Adenosine	POMC	p01189
rehmannia dride rhizome	Adenosine	PRL	p01236
rehmannia dride rhizome	Adenosine	GCG	p01275
rehmannia dride rhizome	Adenosine	ENSG00000146469	p01282
rehmannia dride rhizome	Adenosine	INS	p01308
rehmannia dride rhizome	Adenosine	GAST	p01350
rehmannia dride rhizome	Adenosine	ENSG00000206328	p01375
rehmannia dride rhizome	Adenosine	IFNA1	p01562
rehmannia dride rhizome	Adenosine	IFNG	p01579
rehmannia dride rhizome	Adenosine	IL1B	p01584
rehmannia dride rhizome	Adenosine	EPO	p01588
rehmannia dride rhizome	Adenosine	FN1	p02751
rehmannia dride rhizome	Adenosine	AMBP	p02760
rehmannia dride rhizome	Adenosine	VWF	p04275
rehmannia dride rhizome	Adenosine	NTRK1	p04629
rehmannia dride rhizome	Adenosine	ALPL	p05186
rehmannia dride rhizome	Adenosine	ALPP	p05187
rehmannia dride rhizome	Adenosine	HSF	p05231
rehmannia dride rhizome	Adenosine	EDN1	p05305
rehmannia dride rhizome	Adenosine	BB2	p05362
rehmannia dride rhizome	Adenosine	REGL	p05451
rehmannia dride rhizome	Adenosine	CCK	p06307
rehmannia dride rhizome	Adenosine	PYGL	p06737
rehmannia dride rhizome	Adenosine	LDHB	p07195
rehmannia dride rhizome	Adenosine	ADRB2	p07550
rehmannia dride rhizome	Adenosine	APRT	p07741
rehmannia dride rhizome	Adenosine	LDHC	p07864
rehmannia dride rhizome	Adenosine	RNS1	p07998
rehmannia dride rhizome	Adenosine	PFKM	p08237
rehmannia dride rhizome	Adenosine	MMP2	p08253
rehmannia dride rhizome	Adenosine	HO-1	p09601
rehmannia dride rhizome	Adenosine	CSF1	p09603
rehmannia dride rhizome	Adenosine	SCT	p09683
rehmannia dride rhizome	Adenosine	ALPI	p09923
rehmannia dride rhizome	Adenosine	K60	p10145
rehmannia dride rhizome	Adenosine	GAA	p10253
rehmannia dride rhizome	Adenosine	TSE1	p10644
rehmannia dride rhizome	Adenosine	PYGB	p11216
rehmannia dride rhizome	Adenosine	PYGM	p11217
rehmannia dride rhizome	Adenosine	PIM1	p11309
rehmannia dride rhizome	Adenosine	ODC1	p11926
rehmannia dride rhizome	Adenosine	IMPDH2	p12268
rehmannia dride rhizome	Adenosine	SRC	p12931
rehmannia dride rhizome	Adenosine	SISd	p13501
rehmannia dride rhizome	Adenosine	CF	p13569
rehmannia dride rhizome	Adenosine	ENSG00000117525	p13726
rehmannia dride rhizome	Adenosine	PRKAR2A	p13861
rehmannia dride rhizome	Adenosine	DRD2	p14416
rehmannia dride rhizome	Adenosine	PK3	p14618
rehmannia dride rhizome	Adenosine	MMP9	p14780
rehmannia dride rhizome	Adenosine	VEGFA	p15692
rehmannia dride rhizome	Adenosine	SELP	p16109
rehmannia dride rhizome	Adenosine	CREB1	p16220
rehmannia dride rhizome	Adenosine	GJA1	p17302
rehmannia dride rhizome	Adenosine	UBTF	p17480
rehmannia dride rhizome	Adenosine	PRKACA	p17612
rehmannia dride rhizome	Adenosine	ECGF1	p19971
rehmannia dride rhizome	Adenosine	PGC	p20142
rehmannia dride rhizome	Adenosine	IMPDH1	p20839
rehmannia dride rhizome	Adenosine	AGXT	p21549
rehmannia dride rhizome	Adenosine	NT5E	p21589
rehmannia dride rhizome	Adenosine	DRD1	p21728
rehmannia dride rhizome	Adenosine	FGF7	p21781
rehmannia dride rhizome	Adenosine	SDHB	p21912
rehmannia dride rhizome	Adenosine	DRD5	p21918
rehmannia dride rhizome	Adenosine	COMT	p21964
rehmannia dride rhizome	Adenosine	PCMT1	p22061
rehmannia dride rhizome	Adenosine	IL10	p22301
rehmannia dride rhizome	Adenosine	PRKACG	p22612
rehmannia dride rhizome	Adenosine	PRKACB	p22694
rehmannia dride rhizome	Adenosine	AMPD1	p23109
rehmannia dride rhizome	Adenosine	AHCY	p23526
rehmannia dride rhizome	Adenosine	DP2	p25054
rehmannia dride rhizome	Adenosine	BRD2	p25440
rehmannia dride rhizome	Adenosine	PLN	p26678
rehmannia dride rhizome	Adenosine	ERK1	p27361
rehmannia dride rhizome	Adenosine	DCK	p27707
rehmannia dride rhizome	Adenosine	PDE4A	p27815
rehmannia dride rhizome	Adenosine	HTR1D	p28221
rehmannia dride rhizome	Adenosine	HTR1B	p28222
rehmannia dride rhizome	Adenosine	ERK	p28482
rehmannia dride rhizome	Adenosine	CD38	p28907
rehmannia dride rhizome	Adenosine	ADORA2A	p29274
rehmannia dride rhizome	Adenosine	ADORA2B	p29275
rehmannia dride rhizome	Adenosine	p35	p29459
rehmannia dride rhizome	Adenosine	IL12B	p29460
rehmannia dride rhizome	Adenosine	ENSG00000164867	p29474
rehmannia dride rhizome	Adenosine	CO	p29972
rehmannia dride rhizome	Adenosine	ADSS	p30520
rehmannia dride rhizome	Adenosine	ADORA1	p30542
rehmannia dride rhizome	Adenosine	PKLR	p30613
rehmannia dride rhizome	Adenosine	PRKAR1B	p31321
rehmannia dride rhizome	Adenosine	PRKAR2B	p31323
rehmannia dride rhizome	Adenosine	ATIC	p31939
rehmannia dride rhizome	Adenosine	ADORA3	p33765
rehmannia dride rhizome	Adenosine	IL13	p35225
rehmannia dride rhizome	Adenosine	NOS	p35228
rehmannia dride rhizome	Adenosine	RFC1	p35251
rehmannia dride rhizome	Adenosine	PTGS2	p35354
rehmannia dride rhizome	Adenosine	G6PC	p35575
rehmannia dride rhizome	Adenosine	WND	p35670
rehmannia dride rhizome	Adenosine	CHKA	p35790
rehmannia dride rhizome	Adenosine	PPARG	p37231
rehmannia dride rhizome	Adenosine	ENSG00000107798	p38571
rehmannia dride rhizome	Adenosine	GLUR5	p39086
rehmannia dride rhizome	Adenosine	GDNF	p39905
rehmannia dride rhizome	Adenosine	ADCY8	p40145
rehmannia dride rhizome	Adenosine	NNMT	p40261
rehmannia dride rhizome	Adenosine	PTGDS	p41222
rehmannia dride rhizome	Adenosine	P2RY2	p41231
rehmannia dride rhizome	Adenosine	GRIA2	p42262
rehmannia dride rhizome	Adenosine	PIK4CA	p42356
rehmannia dride rhizome	Adenosine	CASP3	p42574
rehmannia dride rhizome	Adenosine	IP	p43119
rehmannia dride rhizome	Adenosine	KIP1	p46527
rehmannia dride rhizome	Adenosine	P2RY1	p47900
rehmannia dride rhizome	Adenosine	ATP5O	p48047
rehmannia dride rhizome	Adenosine	IDH2	p48735
rehmannia dride rhizome	Adenosine	ATQ1	p49419
rehmannia dride rhizome	Adenosine	SARS	p49591
rehmannia dride rhizome	Adenosine	PRIM1	p49642
rehmannia dride rhizome	Adenosine	NT5C2	p49902
rehmannia dride rhizome	Adenosine	GMPS	p49915
rehmannia dride rhizome	Adenosine	ENTPD1	p49961
rehmannia dride rhizome	Adenosine	P2RX1	p51575
rehmannia dride rhizome	Adenosine	TPMT	p51580
rehmannia dride rhizome	Adenosine	P2RY4	p51582
rehmannia dride rhizome	Adenosine	ADCY7	p51828
rehmannia dride rhizome	Adenosine	ART1	p52961
rehmannia dride rhizome	Adenosine	ERK6	p53778
rehmannia dride rhizome	Adenosine	MHS3	p54289
rehmannia dride rhizome	Adenosine	XMP	p54851
rehmannia dride rhizome	Adenosine	ADK	p55263
rehmannia dride rhizome	Adenosine	ADAR	p55265
rehmannia dride rhizome	Adenosine	MARS	p56192
rehmannia dride rhizome	Adenosine	HM89	p61073
rehmannia dride rhizome	Adenosine	RHOA	p61586
rehmannia dride rhizome	Adenosine	LYZ	p61626
rehmannia dride rhizome	Adenosine	CALM1	p62158
rehmannia dride rhizome	Adenosine	HK1-tb	p78542
rehmannia dride rhizome	Adenosine	ADARB1	p78563
rehmannia dride rhizome	Adenosine	SLI	p98077
rehmannia dride rhizome	Adenosine	CACNA1B	q00975
rehmannia dride rhizome	Adenosine	AMPD3	q01432
rehmannia dride rhizome	Adenosine	HSL	q05469
rehmannia dride rhizome	Adenosine	ADCY2	q08462
rehmannia dride rhizome	Adenosine	ADCY1	q08828
rehmannia dride rhizome	Adenosine	HI	q09428
rehmannia dride rhizome	Adenosine	BST1	q10588
rehmannia dride rhizome	Adenosine	IK	q13123
rehmannia dride rhizome	Adenosine	MTAP	q13126
rehmannia dride rhizome	Adenosine	ERK5	q13164
rehmannia dride rhizome	Adenosine	PRKG2	q13237
rehmannia dride rhizome	Adenosine	NNT	q13423
rehmannia dride rhizome	Adenosine	ART3	q13508
rehmannia dride rhizome	Adenosine	PRKG1	q13976
rehmannia dride rhizome	Adenosine	IL18	q14116
rehmannia dride rhizome	Adenosine	SLC29A2	q14542
rehmannia dride rhizome	Adenosine	KCNJ11	q14654
rehmannia dride rhizome	Adenosine	GNMT	q14749
rehmannia dride rhizome	Adenosine	KIAA0101	q15004
rehmannia dride rhizome	Adenosine	P2Y6	q15077
rehmannia dride rhizome	Adenosine	TWIST1	q15672
rehmannia dride rhizome	Adenosine	p38-2	q15759
rehmannia dride rhizome	Adenosine	KCNJ8	q15842
rehmannia dride rhizome	Adenosine	CACNA1E	q15878
rehmannia dride rhizome	Adenosine	Mxi2	q16539
rehmannia dride rhizome	Adenosine	NTRK2	q16620
rehmannia dride rhizome	Adenosine	MOP1	q16665
rehmannia dride rhizome	Adenosine	dGK	q16854
rehmannia dride rhizome	Adenosine	PRG5	q32zl2
rehmannia dride rhizome	Adenosine	LDHAL6A	q6zmr3
rehmannia dride rhizome	Adenosine	SLC29A4	q7rtt9
rehmannia dride rhizome	Adenosine	IMP	q7z569
rehmannia dride rhizome	Adenosine	TAD2	q7z6v5
rehmannia dride rhizome	Adenosine	SIRT6	q8n6t7
rehmannia dride rhizome	Adenosine	PAF1	q8n7h5
rehmannia dride rhizome	Adenosine	VR1	q8ner1
rehmannia dride rhizome	Adenosine	ADCY4	q8nfm4
rehmannia dride rhizome	Adenosine	CXXC6	q8nfu7
rehmannia dride rhizome	Adenosine	SLC25A40	q8tbp6
rehmannia dride rhizome	Adenosine	cdN	q8tcd5
rehmannia dride rhizome	Adenosine	PNPT1	q8tcs8
rehmannia dride rhizome	Adenosine	p94	q8tet4
rehmannia dride rhizome	Adenosine	TCP11	q8wwu5
rehmannia dride rhizome	Adenosine	NIS	q92911
rehmannia dride rhizome	Adenosine	ART4	q93070
rehmannia dride rhizome	Adenosine	SCAMP4	q969e2
rehmannia dride rhizome	Adenosine	P2Y11	q96g91
rehmannia dride rhizome	Adenosine	AHCYL2	q96hn2
rehmannia dride rhizome	Adenosine	ZFP91	q96jp5
rehmannia dride rhizome	Adenosine	ART5	q96l15
rehmannia dride rhizome	Adenosine	NOX5	q96ph1
rehmannia dride rhizome	Adenosine	C10orf22	q96sz5
rehmannia dride rhizome	Adenosine	P2X4	q99571
rehmannia dride rhizome	Adenosine	P2RX7	q99572
rehmannia dride rhizome	Adenosine	MTR	q99707
rehmannia dride rhizome	Adenosine	SLC29A1	q99808
rehmannia dride rhizome	Adenosine	ADAT1	q9bub4
rehmannia dride rhizome	Adenosine	NT5C1A	q9bxi3
rehmannia dride rhizome	Adenosine	ITPA	q9by32
rehmannia dride rhizome	Adenosine	LDHAL6B	q9byz2
rehmannia dride rhizome	Adenosine	SLC29A3	q9bzd2
rehmannia dride rhizome	Adenosine	NT5C3	q9h0p0
rehmannia dride rhizome	Adenosine	HORK3	q9h244
rehmannia dride rhizome	Adenosine	MIXL1	q9h2w2
rehmannia dride rhizome	Adenosine	RBKS	q9h477
rehmannia dride rhizome	Adenosine	SLC28A3	q9has3
rehmannia dride rhizome	Adenosine	UPF2	q9hau5
rehmannia dride rhizome	Adenosine	AIRP	q9hbh5
rehmannia dride rhizome	Adenosine	mdN	q9npb1
rehmannia dride rhizome	Adenosine	DIABLO	q9nr28
rehmannia dride rhizome	Adenosine	ADARB2	q9ns39
rehmannia dride rhizome	Adenosine	PIK4CB	q9ubf8
rehmannia dride rhizome	Adenosine	P2X2	q9ubl9
rehmannia dride rhizome	Adenosine	PPP1R1B	q9ud71
rehmannia dride rhizome	Adenosine	TBK1	q9uhd2
rehmannia dride rhizome	Adenosine	C11orf2	q9uid3
rehmannia dride rhizome	Adenosine	TCFL5	q9ul49
rehmannia dride rhizome	Adenosine	ABCG2	q9unq0
rehmannia dride rhizome	Adenosine	CHKB	q9y259
rehmannia dride rhizome	Adenosine	ENTPD2	q9y5l3
rehmannia dride rhizome	Campesterol	CYP-M	b4dln7
rehmannia dride rhizome	Campesterol	SOAT2	o75908
rehmannia dride rhizome	Campesterol	ABCA1	o95477
rehmannia dride rhizome	Campesterol	ADA	p00813
rehmannia dride rhizome	Campesterol	APOA1	p02647
rehmannia dride rhizome	Campesterol	APOE	p02649
rehmannia dride rhizome	Campesterol	APOB	p04114
rehmannia dride rhizome	Campesterol	HMGA1	p17096
rehmannia dride rhizome	Campesterol	SRD5A1	p18405
rehmannia dride rhizome	Campesterol	CYP7A1	p22680
rehmannia dride rhizome	Campesterol	SOAT1	p35610
rehmannia dride rhizome	Campesterol	SREBF1	p36956
rehmannia dride rhizome	Campesterol	CSN1	p47710
rehmannia dride rhizome	Campesterol	RPIA	p49247
rehmannia dride rhizome	Campesterol	P2RY4	p51582
rehmannia dride rhizome	Campesterol	NER	p55055
rehmannia dride rhizome	Campesterol	EVC	p57679
rehmannia dride rhizome	Campesterol	SREBF2	q12772
rehmannia dride rhizome	Campesterol	LXR-a	q13133
rehmannia dride rhizome	Campesterol	SQLE	q14534
rehmannia dride rhizome	Campesterol	COG2	q14746
rehmannia dride rhizome	Campesterol	DHCR24	q15392
rehmannia dride rhizome	Campesterol	NNAT	q16517
rehmannia dride rhizome	Campesterol	LDM	q16850
rehmannia dride rhizome	Campesterol	GNPTA	q3t906
rehmannia dride rhizome	Campesterol	EVC2	q86uk5
rehmannia dride rhizome	Campesterol	UGTrel4	q8tb61
rehmannia dride rhizome	Campesterol	SRB1	q8wtv0
rehmannia dride rhizome	Campesterol	ABCC2	q92887
rehmannia dride rhizome	Campesterol	C1orf116	q9bw04
rehmannia dride rhizome	Campesterol	ABCG8	q9h221
rehmannia dride rhizome	Campesterol	ABCG5	q9h222
rehmannia dride rhizome	Campesterol	SRMS	q9h3y6
rehmannia dride rhizome	Campesterol	UGT1A5	q9haw9
rehmannia dride rhizome	Campesterol	DHCR7	q9ubm7
rehmannia dride rhizome	Campesterol	NPC1L1	q9uhc9
rehmannia dride rhizome	Campesterol	SLC45A2	q9umx9
rehmannia dride rhizome	Campesterol	CYP8B1	q9unu6
rehmannia dride rhizome	Campesterol	ENGL-a	q9y2c4
rehmannia dride rhizome	Campesterol	CYP46	q9y6a2
rehmannia dride rhizome	Campesterol	SLCO1B1	q9y6l6
rehmannia dride rhizome	#N/A	CDC123	o75794
rehmannia dride rhizome	#N/A	COX1	p00395
rehmannia dride rhizome	#N/A	ASGR1	p07306
rehmannia dride rhizome	#N/A	ASGR2	p07307
rehmannia dride rhizome	#N/A	GP1B	p07359
rehmannia dride rhizome	#N/A	VIL	p09327
rehmannia dride rhizome	#N/A	CYP7A1	p22680
rehmannia dride rhizome	#N/A	DCT1	p49281
rehmannia dride rhizome	#N/A	GCNT2	q06430
rehmannia dride rhizome	#N/A	PTGDR	q13258
rehmannia dride rhizome	#N/A	SLC29A2	q14542
rehmannia dride rhizome	#N/A	ARTN	q5t4w7
rehmannia dride rhizome	#N/A	SLC29A1	q99808
rehmannia dride rhizome	#N/A	NKX6-2	q9c056
rehmannia dride rhizome	#N/A	SLC22A4	q9h015
rehmannia dride rhizome	#N/A	ABCG8	q9h221
rehmannia dride rhizome	#N/A	ABCG5	q9h222
rehmannia dride rhizome	#N/A	AS3	q9nti5
rehmannia dride rhizome	#N/A	MRPS7	q9y2r9
rehmannia dride rhizome	#N/A	SLC30A1	q9y6m5
rehmannia dride rhizome	cis-9,cis-12-Linoleic acid	SCD	o00767
rehmannia dride rhizome	cis-9,cis-12-Linoleic acid	FFAR1	o14842
rehmannia dride rhizome	cis-9,cis-12-Linoleic acid	ACOX3	o15254
rehmannia dride rhizome	cis-9,cis-12-Linoleic acid	ALOX15B	o15296
rehmannia dride rhizome	cis-9,cis-12-Linoleic acid	PLA2G10	o15496
rehmannia dride rhizome	cis-9,cis-12-Linoleic acid	KIF5C	o60282
rehmannia dride rhizome	cis-9,cis-12-Linoleic acid	iPLA2	o60733
rehmannia dride rhizome	cis-9,cis-12-Linoleic acid	ALOX12B	o75342
rehmannia dride rhizome	cis-9,cis-12-Linoleic acid	CHUK	o75477
rehmannia dride rhizome	cis-9,cis-12-Linoleic acid	SOAT2	o75908
rehmannia dride rhizome	cis-9,cis-12-Linoleic acid	PXE	o95255
rehmannia dride rhizome	cis-9,cis-12-Linoleic acid	GG2-1	o95379
rehmannia dride rhizome	cis-9,cis-12-Linoleic acid	ABCA1	o95477
rehmannia dride rhizome	cis-9,cis-12-Linoleic acid	D6D	o95864
rehmannia dride rhizome	cis-9,cis-12-Linoleic acid	CYB5A	p00167
rehmannia dride rhizome	cis-9,cis-12-Linoleic acid	COX1	p00395
rehmannia dride rhizome	cis-9,cis-12-Linoleic acid	GOT2	p00505
rehmannia dride rhizome	cis-9,cis-12-Linoleic acid	EGFR	p00533
rehmannia dride rhizome	cis-9,cis-12-Linoleic acid	F2	p00734
rehmannia dride rhizome	cis-9,cis-12-Linoleic acid	LDLR	p01130
rehmannia dride rhizome	cis-9,cis-12-Linoleic acid	EGF	p01133
rehmannia dride rhizome	cis-9,cis-12-Linoleic acid	INS	p01308
rehmannia dride rhizome	cis-9,cis-12-Linoleic acid	ENSG00000206328	p01375
rehmannia dride rhizome	cis-9,cis-12-Linoleic acid	APOE	p02649
rehmannia dride rhizome	cis-9,cis-12-Linoleic acid	ALB	p02768
rehmannia dride rhizome	cis-9,cis-12-Linoleic acid	CAT	p04040
rehmannia dride rhizome	cis-9,cis-12-Linoleic acid	PLA2	p04054
rehmannia dride rhizome	cis-9,cis-12-Linoleic acid	APOB	p04114
rehmannia dride rhizome	cis-9,cis-12-Linoleic acid	SOD2	p04179
rehmannia dride rhizome	cis-9,cis-12-Linoleic acid	PAI	p05121
rehmannia dride rhizome	cis-9,cis-12-Linoleic acid	CYP1A2	p05177
rehmannia dride rhizome	cis-9,cis-12-Linoleic acid	CYP2E1	p05181
rehmannia dride rhizome	cis-9,cis-12-Linoleic acid	EDN1	p05305
rehmannia dride rhizome	cis-9,cis-12-Linoleic acid	BB2	p05362
rehmannia dride rhizome	cis-9,cis-12-Linoleic acid	CD2	p06729
rehmannia dride rhizome	cis-9,cis-12-Linoleic acid	LPL	p06858
rehmannia dride rhizome	cis-9,cis-12-Linoleic acid	FABP1	p07148
rehmannia dride rhizome	cis-9,cis-12-Linoleic acid	TRY1	p07477
rehmannia dride rhizome	cis-9,cis-12-Linoleic acid	TRY2	p07478
rehmannia dride rhizome	cis-9,cis-12-Linoleic acid	DCN	p07585
rehmannia dride rhizome	cis-9,cis-12-Linoleic acid	ELA2	p08246
rehmannia dride rhizome	cis-9,cis-12-Linoleic acid	CYP3A4	p08684
rehmannia dride rhizome	cis-9,cis-12-Linoleic acid	LCT	p09848
rehmannia dride rhizome	cis-9,cis-12-Linoleic acid	ALOX5	p09917
rehmannia dride rhizome	cis-9,cis-12-Linoleic acid	LTA4H	p09960
rehmannia dride rhizome	cis-9,cis-12-Linoleic acid	K60	p10145
rehmannia dride rhizome	cis-9,cis-12-Linoleic acid	PRB4	p10163
rehmannia dride rhizome	cis-9,cis-12-Linoleic acid	CYP2C8	p10632
rehmannia dride rhizome	cis-9,cis-12-Linoleic acid	CR3A	p11215
rehmannia dride rhizome	cis-9,cis-12-Linoleic acid	CETP	p11597
rehmannia dride rhizome	cis-9,cis-12-Linoleic acid	CYP2C9	p11712
rehmannia dride rhizome	cis-9,cis-12-Linoleic acid	PLA2G2A	p14555
rehmannia dride rhizome	cis-9,cis-12-Linoleic acid	FABP4	p15090
rehmannia dride rhizome	cis-9,cis-12-Linoleic acid	CD13	p15144
rehmannia dride rhizome	cis-9,cis-12-Linoleic acid	ALOX15	p16050
rehmannia dride rhizome	cis-9,cis-12-Linoleic acid	PNLIP	p16233
rehmannia dride rhizome	cis-9,cis-12-Linoleic acid	UGT2B7	p16662
rehmannia dride rhizome	cis-9,cis-12-Linoleic acid	GP4	p16671
rehmannia dride rhizome	cis-9,cis-12-Linoleic acid	ALOX12	p18054
rehmannia dride rhizome	cis-9,cis-12-Linoleic acid	CEL	p19835
rehmannia dride rhizome	cis-9,cis-12-Linoleic acid	KBF1	p19838
rehmannia dride rhizome	cis-9,cis-12-Linoleic acid	ECGF1	p19971
rehmannia dride rhizome	cis-9,cis-12-Linoleic acid	ALOX5AP	p20292
rehmannia dride rhizome	cis-9,cis-12-Linoleic acid	ITGAX	p20702
rehmannia dride rhizome	cis-9,cis-12-Linoleic acid	PCN3	p20815
rehmannia dride rhizome	cis-9,cis-12-Linoleic acid	HER3	p21860
rehmannia dride rhizome	cis-9,cis-12-Linoleic acid	NME2	p22392
rehmannia dride rhizome	cis-9,cis-12-Linoleic acid	PTGS1	p23219
rehmannia dride rhizome	cis-9,cis-12-Linoleic acid	CPT2	p23786
rehmannia dride rhizome	cis-9,cis-12-Linoleic acid	CP37	p24462
rehmannia dride rhizome	cis-9,cis-12-Linoleic acid	UCP	p25874
rehmannia dride rhizome	cis-9,cis-12-Linoleic acid	LOX	p28300
rehmannia dride rhizome	cis-9,cis-12-Linoleic acid	CD38	p28907
rehmannia dride rhizome	cis-9,cis-12-Linoleic acid	SDC4	p31431
rehmannia dride rhizome	cis-9,cis-12-Linoleic acid	AKT1	p31749
rehmannia dride rhizome	cis-9,cis-12-Linoleic acid	ACSL1	p33121
rehmannia dride rhizome	cis-9,cis-12-Linoleic acid	KIF5B	p33176
rehmannia dride rhizome	cis-9,cis-12-Linoleic acid	CYP2C18	p33260
rehmannia dride rhizome	cis-9,cis-12-Linoleic acid	CYP2C19	p33261
rehmannia dride rhizome	cis-9,cis-12-Linoleic acid	CD68	p34810
rehmannia dride rhizome	cis-9,cis-12-Linoleic acid	EPHX2	p34913
rehmannia dride rhizome	cis-9,cis-12-Linoleic acid	PRSS3	p35030
rehmannia dride rhizome	cis-9,cis-12-Linoleic acid	PTGS2	p35354
rehmannia dride rhizome	cis-9,cis-12-Linoleic acid	PCK1	p35558
rehmannia dride rhizome	cis-9,cis-12-Linoleic acid	IRS1	p35568
rehmannia dride rhizome	cis-9,cis-12-Linoleic acid	SOAT1	p35610
rehmannia dride rhizome	cis-9,cis-12-Linoleic acid	SREBF1	p36956
rehmannia dride rhizome	cis-9,cis-12-Linoleic acid	MCSP	p36969
rehmannia dride rhizome	cis-9,cis-12-Linoleic acid	PPARG	p37231
rehmannia dride rhizome	cis-9,cis-12-Linoleic acid	PLA2G5	p39877
rehmannia dride rhizome	cis-9,cis-12-Linoleic acid	OBS	p41159
rehmannia dride rhizome	cis-9,cis-12-Linoleic acid	PTGDS	p41222
rehmannia dride rhizome	cis-9,cis-12-Linoleic acid	ABC8	p45844
rehmannia dride rhizome	cis-9,cis-12-Linoleic acid	MAPK8	p45983
rehmannia dride rhizome	cis-9,cis-12-Linoleic acid	CSN1	p47710
rehmannia dride rhizome	cis-9,cis-12-Linoleic acid	PLA2G4A	p47712
rehmannia dride rhizome	cis-9,cis-12-Linoleic acid	LEPR	p48357
rehmannia dride rhizome	cis-9,cis-12-Linoleic acid	FASN	p49327
rehmannia dride rhizome	cis-9,cis-12-Linoleic acid	CPT1A	p50416
rehmannia dride rhizome	cis-9,cis-12-Linoleic acid	CYP2J2	p51589
rehmannia dride rhizome	cis-9,cis-12-Linoleic acid	CTSC	p53634
rehmannia dride rhizome	cis-9,cis-12-Linoleic acid	UCP2	p55851
rehmannia dride rhizome	cis-9,cis-12-Linoleic acid	PRES	p58743
rehmannia dride rhizome	cis-9,cis-12-Linoleic acid	OLR1	p78380
rehmannia dride rhizome	cis-9,cis-12-Linoleic acid	NFKB2	q00653
rehmannia dride rhizome	cis-9,cis-12-Linoleic acid	RELB	q01201
rehmannia dride rhizome	cis-9,cis-12-Linoleic acid	PRKCE	q02156
rehmannia dride rhizome	cis-9,cis-12-Linoleic acid	PLOD1	q02809
rehmannia dride rhizome	cis-9,cis-12-Linoleic acid	GSTM4	q03013
rehmannia dride rhizome	cis-9,cis-12-Linoleic acid	B94	q03169
rehmannia dride rhizome	cis-9,cis-12-Linoleic acid	PPARD	q03181
rehmannia dride rhizome	cis-9,cis-12-Linoleic acid	RELA	q04206
rehmannia dride rhizome	cis-9,cis-12-Linoleic acid	PPARA	q07869
rehmannia dride rhizome	cis-9,cis-12-Linoleic acid	KCNMA1	q12791
rehmannia dride rhizome	cis-9,cis-12-Linoleic acid	LXR-a	q13133
rehmannia dride rhizome	cis-9,cis-12-Linoleic acid	B61	q13829
rehmannia dride rhizome	cis-9,cis-12-Linoleic acid	ACOX1	q15067
rehmannia dride rhizome	cis-9,cis-12-Linoleic acid	ERBB4	q15303
rehmannia dride rhizome	cis-9,cis-12-Linoleic acid	ADIPOQ	q15848
rehmannia dride rhizome	cis-9,cis-12-Linoleic acid	PCSK7	q16549
rehmannia dride rhizome	cis-9,cis-12-Linoleic acid	DECR	q16698
rehmannia dride rhizome	cis-9,cis-12-Linoleic acid	ACSBG2	q5fve4
rehmannia dride rhizome	cis-9,cis-12-Linoleic acid	TNFAIP8L3	q5gj75
rehmannia dride rhizome	cis-9,cis-12-Linoleic acid	GPR120	q5nul3
rehmannia dride rhizome	cis-9,cis-12-Linoleic acid	LIN9	q5tka1
rehmannia dride rhizome	cis-9,cis-12-Linoleic acid	PPRC1	q5vv67
rehmannia dride rhizome	cis-9,cis-12-Linoleic acid	TNFAIP8L2	q6p589
rehmannia dride rhizome	cis-9,cis-12-Linoleic acid	EPGN	q6uw88
rehmannia dride rhizome	cis-9,cis-12-Linoleic acid	DSG4	q86sj6
rehmannia dride rhizome	cis-9,cis-12-Linoleic acid	SCD5	q86sk9
rehmannia dride rhizome	cis-9,cis-12-Linoleic acid	CASZ1	q86v15
rehmannia dride rhizome	cis-9,cis-12-Linoleic acid	FANCB	q8nb91
rehmannia dride rhizome	cis-9,cis-12-Linoleic acid	AYTL2	q8nf37
rehmannia dride rhizome	cis-9,cis-12-Linoleic acid	FLAD1	q8nff5
rehmannia dride rhizome	cis-9,cis-12-Linoleic acid	CPT1C	q8tcg5
rehmannia dride rhizome	cis-9,cis-12-Linoleic acid	NETO1	q8tdf5
rehmannia dride rhizome	cis-9,cis-12-Linoleic acid	GPR119	q8tdv5
rehmannia dride rhizome	cis-9,cis-12-Linoleic acid	ACMSD	q8tdx5
rehmannia dride rhizome	cis-9,cis-12-Linoleic acid	TNFAIP8L1	q8wvp5
rehmannia dride rhizome	cis-9,cis-12-Linoleic acid	CPT1B	q92523
rehmannia dride rhizome	cis-9,cis-12-Linoleic acid	HTATIP	q92993
rehmannia dride rhizome	cis-9,cis-12-Linoleic acid	PLEKHG5	q93038
rehmannia dride rhizome	cis-9,cis-12-Linoleic acid	RHBDF1	q96cc6
rehmannia dride rhizome	cis-9,cis-12-Linoleic acid	SLC27A1	q96dy3
rehmannia dride rhizome	cis-9,cis-12-Linoleic acid	IKBR	q96ha7
rehmannia dride rhizome	cis-9,cis-12-Linoleic acid	TNFAIP3	q96kp6
rehmannia dride rhizome	cis-9,cis-12-Linoleic acid	EIF2AK1	q9bqi3
rehmannia dride rhizome	cis-9,cis-12-Linoleic acid	ABHD6	q9bv23
rehmannia dride rhizome	cis-9,cis-12-Linoleic acid	PLA2G12B	q9bx93
rehmannia dride rhizome	cis-9,cis-12-Linoleic acid	FACD	q9bxw9
rehmannia dride rhizome	cis-9,cis-12-Linoleic acid	ALOXE3	q9byj1
rehmannia dride rhizome	cis-9,cis-12-Linoleic acid	PLA2G12	q9bzm1
rehmannia dride rhizome	cis-9,cis-12-Linoleic acid	PLA2G2F	q9bzm2
rehmannia dride rhizome	cis-9,cis-12-Linoleic acid	SIGLEC1	q9bzz2
rehmannia dride rhizome	cis-9,cis-12-Linoleic acid	PTGES2	q9h7z7
rehmannia dride rhizome	cis-9,cis-12-Linoleic acid	CYP3A43	q9hb55
rehmannia dride rhizome	cis-9,cis-12-Linoleic acid	ZFYVE1	q9hbf4
rehmannia dride rhizome	cis-9,cis-12-Linoleic acid	GPAM	q9hcl2
rehmannia dride rhizome	cis-9,cis-12-Linoleic acid	TRIM39	q9hcm9
rehmannia dride rhizome	cis-9,cis-12-Linoleic acid	ELOVL5	q9nyp7
rehmannia dride rhizome	cis-9,cis-12-Linoleic acid	PLA2G3	q9nz20
rehmannia dride rhizome	cis-9,cis-12-Linoleic acid	GLTP	q9nzd2
rehmannia dride rhizome	cis-9,cis-12-Linoleic acid	PLA2G2E	q9nzk7
rehmannia dride rhizome	cis-9,cis-12-Linoleic acid	PPM2C	q9p0j1
rehmannia dride rhizome	cis-9,cis-12-Linoleic acid	CALCOCO1	q9p1z2
rehmannia dride rhizome	cis-9,cis-12-Linoleic acid	PPARGC1A	q9ubk2
rehmannia dride rhizome	cis-9,cis-12-Linoleic acid	PHR1	q9uf11
rehmannia dride rhizome	cis-9,cis-12-Linoleic acid	TBK1	q9uhd2
rehmannia dride rhizome	cis-9,cis-12-Linoleic acid	PLA2G2D	q9unk4
rehmannia dride rhizome	cis-9,cis-12-Linoleic acid	LCAT	q9up95
rehmannia dride rhizome	cis-9,cis-12-Linoleic acid	LCP	q9y2u9
rehmannia dride rhizome	cis-9,cis-12-Linoleic acid	D5D	q9y5q0
rehmannia dride rhizome	cis-9,cis-12-Linoleic acid	SMRT	q9y618
rehmannia dride rhizome	Malic acid	BXDC2	a0jlq5
rehmannia dride rhizome	Malic acid	FOR	a8k5i5
rehmannia dride rhizome	Malic acid	ENSG00000108958	b4del5
rehmannia dride rhizome	Malic acid	C12orf39	f5gxe5
rehmannia dride rhizome	Malic acid	NDUFS8	o00217
rehmannia dride rhizome	Malic acid	PDHX	o00330
rehmannia dride rhizome	Malic acid	ENSG00000130957	o00757
rehmannia dride rhizome	Malic acid	SDHD	o14521
rehmannia dride rhizome	Malic acid	ENPP3	o14638
rehmannia dride rhizome	Malic acid	TIMM23	o14925
rehmannia dride rhizome	Malic acid	NDUFA1	o15239
rehmannia dride rhizome	Malic acid	PHGDH	o43175
rehmannia dride rhizome	Malic acid	NDUFS4	o43181
rehmannia dride rhizome	Malic acid	MGAM	o43451
rehmannia dride rhizome	Malic acid	IDH3B	o43837
rehmannia dride rhizome	Malic acid	TIMM8A	o60220
rehmannia dride rhizome	Malic acid	ABCB7	o75027
rehmannia dride rhizome	Malic acid	NDUFS7	o75251
rehmannia dride rhizome	Malic acid	NDUFS2	o75306
rehmannia dride rhizome	Malic acid	CS	o75390
rehmannia dride rhizome	Malic acid	Aralar	o75746
rehmannia dride rhizome	Malic acid	IDH1	o75874
rehmannia dride rhizome	Malic acid	PGM3	o95394
rehmannia dride rhizome	Malic acid	H6PD	o95479
rehmannia dride rhizome	Malic acid	COB	p00156
rehmannia dride rhizome	Malic acid	LDHA	p00338
rehmannia dride rhizome	Malic acid	GLUD1	p00367
rehmannia dride rhizome	Malic acid	GSR	p00390
rehmannia dride rhizome	Malic acid	GOT2	p00505
rehmannia dride rhizome	Malic acid	PGK1	p00558
rehmannia dride rhizome	Malic acid	ASS1	p00966
rehmannia dride rhizome	Malic acid	PI	p01009
rehmannia dride rhizome	Malic acid	GCG	p01275
rehmannia dride rhizome	Malic acid	ND2	p03891
rehmannia dride rhizome	Malic acid	ND4	p03905
rehmannia dride rhizome	Malic acid	CAT	p04040
rehmannia dride rhizome	Malic acid	ALDOA	p04075
rehmannia dride rhizome	Malic acid	SOD2	p04179
rehmannia dride rhizome	Malic acid	GAPDH	p04406
rehmannia dride rhizome	Malic acid	ASL	p04424
rehmannia dride rhizome	Malic acid	CYBB	p04839
rehmannia dride rhizome	Malic acid	ALDOB	p05062
rehmannia dride rhizome	Malic acid	UROD	p06132
rehmannia dride rhizome	Malic acid	ENSG00000166278	p06681
rehmannia dride rhizome	Malic acid	LDHB	p07195
rehmannia dride rhizome	Malic acid	PGK2	p07205
rehmannia dride rhizome	Malic acid	LDHC	p07864
rehmannia dride rhizome	Malic acid	FH	p07954
rehmannia dride rhizome	Malic acid	PFKM	p08237
rehmannia dride rhizome	Malic acid	PDHA1	p08559
rehmannia dride rhizome	Malic acid	ACAA1	p09110
rehmannia dride rhizome	Malic acid	FBP1	p09467
rehmannia dride rhizome	Malic acid	DLD	p09622
rehmannia dride rhizome	Malic acid	ALDOC	p09972
rehmannia dride rhizome	Malic acid	TXN	p10599
rehmannia dride rhizome	Malic acid	PDHB	p11177
rehmannia dride rhizome	Malic acid	G6PD	p11413
rehmannia dride rhizome	Malic acid	PC	p11498
rehmannia dride rhizome	Malic acid	FDH	p11766
rehmannia dride rhizome	Malic acid	SLC25A4	p12235
rehmannia dride rhizome	Malic acid	SLC25A6	p12236
rehmannia dride rhizome	Malic acid	CYBA	p13498
rehmannia dride rhizome	Malic acid	PK3	p14618
rehmannia dride rhizome	Malic acid	GLUL	p15104
rehmannia dride rhizome	Malic acid	AGC1	p16112
rehmannia dride rhizome	Malic acid	GOT1	p17174
rehmannia dride rhizome	Malic acid	PFKL	p17858
rehmannia dride rhizome	Malic acid	ACO1	p21399
rehmannia dride rhizome	Malic acid	GPD1	p21695
rehmannia dride rhizome	Malic acid	VDAC1	p21796
rehmannia dride rhizome	Malic acid	SDHB	p21912
rehmannia dride rhizome	Malic acid	ME2	p23368
rehmannia dride rhizome	Malic acid	GLDC	p23378
rehmannia dride rhizome	Malic acid	ACAT1	p24752
rehmannia dride rhizome	Malic acid	ADSS	p30520
rehmannia dride rhizome	Malic acid	PKLR	p30613
rehmannia dride rhizome	Malic acid	SDHA	p31040
rehmannia dride rhizome	Malic acid	HIBADH	p31937
rehmannia dride rhizome	Malic acid	GK	p32189
rehmannia dride rhizome	Malic acid	HK4	p35557
rehmannia dride rhizome	Malic acid	PCK1	p35558
rehmannia dride rhizome	Malic acid	G6PC	p35575
rehmannia dride rhizome	Malic acid	PGM1	p36871
rehmannia dride rhizome	Malic acid	DCT	p40126
rehmannia dride rhizome	Malic acid	MDH1	p40925
rehmannia dride rhizome	Malic acid	MDH2	p40926
rehmannia dride rhizome	Malic acid	SATT	p43007
rehmannia dride rhizome	Malic acid	CAT1	p43155
rehmannia dride rhizome	Malic acid	GPD2	p43304
rehmannia dride rhizome	Malic acid	MTNR1A	p48039
rehmannia dride rhizome	Malic acid	ME1	p48163
rehmannia dride rhizome	Malic acid	IREB2	p48200
rehmannia dride rhizome	Malic acid	IDH2	p48735
rehmannia dride rhizome	Malic acid	MTNR1B	p49286
rehmannia dride rhizome	Malic acid	GLUD2	p49448
rehmannia dride rhizome	Malic acid	IDH3A	p50213
rehmannia dride rhizome	Malic acid	CPT1A	p50416
rehmannia dride rhizome	Malic acid	PGD	p52209
rehmannia dride rhizome	Malic acid	ACLY	p53396
rehmannia dride rhizome	Malic acid	CASP9	p55211
rehmannia dride rhizome	Malic acid	HDAC4	p56524
rehmannia dride rhizome	Malic acid	JAG1	p78504
rehmannia dride rhizome	Malic acid	HK1-tb	p78542
rehmannia dride rhizome	Malic acid	CYCS	p99999
rehmannia dride rhizome	Malic acid	SORD	q00796
rehmannia dride rhizome	Malic acid	PFKP	q01813
rehmannia dride rhizome	Malic acid	SLC25A11	q02978
rehmannia dride rhizome	Malic acid	NS1	q06124
rehmannia dride rhizome	Malic acid	CRYZ	q08257
rehmannia dride rhizome	Malic acid	SCRN3	q0vdg4
rehmannia dride rhizome	Malic acid	SLC13A2	q13183
rehmannia dride rhizome	Malic acid	SGCG	q13326
rehmannia dride rhizome	Malic acid	NNT	q13423
rehmannia dride rhizome	Malic acid	DECR	q16698
rehmannia dride rhizome	Malic acid	ME3	q16798
rehmannia dride rhizome	Malic acid	PCK2	q16822
rehmannia dride rhizome	Malic acid	KAR	q53gq0
rehmannia dride rhizome	Malic acid	C9orf103	q5t6j7
rehmannia dride rhizome	Malic acid	A6r	q6ibs0
rehmannia dride rhizome	Malic acid	PGM2L1	q6pce3
rehmannia dride rhizome	Malic acid	LYCAT	q6uwp7
rehmannia dride rhizome	Malic acid	LDHAL6A	q6zmr3
rehmannia dride rhizome	Malic acid	APTX	q7z2e3
rehmannia dride rhizome	Malic acid	LDHD	q86wu2
rehmannia dride rhizome	Malic acid	C10orf65	q86xe5
rehmannia dride rhizome	Malic acid	SLC13A5	q86yt5
rehmannia dride rhizome	Malic acid	ADHFE1	q8iww8
rehmannia dride rhizome	Malic acid	AMAC1	q8n808
rehmannia dride rhizome	Malic acid	CYBASC3	q8nbi2
rehmannia dride rhizome	Malic acid	GOT1L1	q8nhs2
rehmannia dride rhizome	Malic acid	OSX	q8tdd2
rehmannia dride rhizome	Malic acid	SLC13A3	q8wwt9
rehmannia dride rhizome	Malic acid	SLC35B4	q969s0
rehmannia dride rhizome	Malic acid	PGM2	q96g03
rehmannia dride rhizome	Malic acid	DHTKD1	q96hy7
rehmannia dride rhizome	Malic acid	TRERF1	q96pn7
rehmannia dride rhizome	Malic acid	CLCC1	q96s66
rehmannia dride rhizome	Malic acid	SDHC	q99643
rehmannia dride rhizome	Malic acid	ACO2	q99798
rehmannia dride rhizome	Malic acid	ENSG00000158716	q9bvj7
rehmannia dride rhizome	Malic acid	FACD	q9bxw9
rehmannia dride rhizome	Malic acid	LDHAL6B	q9byz2
rehmannia dride rhizome	Malic acid	DPAGT1	q9h3h5
rehmannia dride rhizome	Malic acid	NARFL	q9h6q4
rehmannia dride rhizome	Malic acid	L2HGDH	q9h9p8
rehmannia dride rhizome	Malic acid	NANS	q9nr45
rehmannia dride rhizome	Malic acid	PPM2C	q9p0j1
rehmannia dride rhizome	Malic acid	PDP2	q9p2j9
rehmannia dride rhizome	Malic acid	DIC	q9ubx3
rehmannia dride rhizome	Malic acid	HAO1	q9ujm8
rehmannia dride rhizome	Malic acid	CTLN2	q9ujs0
rehmannia dride rhizome	Malic acid	DNPEP	q9ula0
rehmannia dride rhizome	Malic acid	OGDHL	q9uld0
rehmannia dride rhizome	Malic acid	SAMHD1	q9y3z3
rehmannia dride rhizome	Malic acid	Tim13	q9y5l4
rehmannia dride rhizome	Raffinose	MANBA	o00462
rehmannia dride rhizome	Raffinose	GAPDHS	o14556
rehmannia dride rhizome	Raffinose	COCH	o43405
rehmannia dride rhizome	Raffinose	CHMP2A	o43633
rehmannia dride rhizome	Raffinose	CBX6	o95503
rehmannia dride rhizome	Raffinose	Hxt	o96004
rehmannia dride rhizome	Raffinose	IGJ	p01591
rehmannia dride rhizome	Raffinose	LRG1	p02750
rehmannia dride rhizome	Raffinose	CAT	p04040
rehmannia dride rhizome	Raffinose	GAPDH	p04406
rehmannia dride rhizome	Raffinose	IL4	p05112
rehmannia dride rhizome	Raffinose	IL5	p05113
rehmannia dride rhizome	Raffinose	GLA	p06280
rehmannia dride rhizome	Raffinose	LPA	p08519
rehmannia dride rhizome	Raffinose	CYC1	p08574
rehmannia dride rhizome	Raffinose	DLD	p09622
rehmannia dride rhizome	Raffinose	GAA	p10253
rehmannia dride rhizome	Raffinose	ALDR1	p15121
rehmannia dride rhizome	Raffinose	GLB1	p16278
rehmannia dride rhizome	Raffinose	VDAC1	p21796
rehmannia dride rhizome	Raffinose	MUT	p22033
rehmannia dride rhizome	Raffinose	NFYB	p25208
rehmannia dride rhizome	Raffinose	CO	p29972
rehmannia dride rhizome	Raffinose	GK	p32189
rehmannia dride rhizome	Raffinose	CBS	p35520
rehmannia dride rhizome	Raffinose	WND	p35670
rehmannia dride rhizome	Raffinose	DLST	p36957
rehmannia dride rhizome	Raffinose	VA68	p38606
rehmannia dride rhizome	Raffinose	COL18A1	p39060
rehmannia dride rhizome	Raffinose	p58	p43630
rehmannia dride rhizome	Raffinose	CSN1	p47710
rehmannia dride rhizome	Raffinose	SLC6A12	p48065
rehmannia dride rhizome	Raffinose	GALK	p51570
rehmannia dride rhizome	Raffinose	PRKAG1	p54619
rehmannia dride rhizome	Raffinose	EPHB4	p54760
rehmannia dride rhizome	Raffinose	GALC	p54803
rehmannia dride rhizome	Raffinose	ALDH18A1	p54886
rehmannia dride rhizome	Raffinose	BPES	p58012
rehmannia dride rhizome	Raffinose	RPS15A	p62244
rehmannia dride rhizome	Raffinose	MRPS6	p82932
rehmannia dride rhizome	Raffinose	PRR5	p85298
rehmannia dride rhizome	Raffinose	GALK2	q01415
rehmannia dride rhizome	Raffinose	B94	q03169
rehmannia dride rhizome	Raffinose	PTS	q03393
rehmannia dride rhizome	Raffinose	SLC3A1	q07837
rehmannia dride rhizome	Raffinose	MEK5	q13163
rehmannia dride rhizome	Raffinose	ERK5	q13164
rehmannia dride rhizome	Raffinose	ASAH1	q13510
rehmannia dride rhizome	Raffinose	BLMH	q13867
rehmannia dride rhizome	Raffinose	GKTB	q14409
rehmannia dride rhizome	Raffinose	ENSG00000196475	q14410
rehmannia dride rhizome	Raffinose	RBM39	q14498
rehmannia dride rhizome	Raffinose	MLC1	q15049
rehmannia dride rhizome	Raffinose	FXN	q16595
rehmannia dride rhizome	Raffinose	CDO1	q16878
rehmannia dride rhizome	Raffinose	ACSM3	q53fz2
rehmannia dride rhizome	Raffinose	SPECC1	q5m775
rehmannia dride rhizome	Raffinose	PRR9	q5t870
rehmannia dride rhizome	Raffinose	MSL1	q68dk7
rehmannia dride rhizome	Raffinose	GLB1L	q6uwu2
rehmannia dride rhizome	Raffinose	SUPT6H	q7kz85
rehmannia dride rhizome	Raffinose	CXorf43	q7z353
rehmannia dride rhizome	Raffinose	POLN	q7z5q5
rehmannia dride rhizome	Raffinose	MSL3L1	q8n5y2
rehmannia dride rhizome	Raffinose	GLB1L3	q8nci6
rehmannia dride rhizome	Raffinose	IL31RA	q8ni17
rehmannia dride rhizome	Raffinose	PRR7	q8tb68
rehmannia dride rhizome	Raffinose	HM13	q8tct9
rehmannia dride rhizome	Raffinose	p94	q8tet4
rehmannia dride rhizome	Raffinose	CLEC2B	q92478
rehmannia dride rhizome	Raffinose	SRG3	q92922
rehmannia dride rhizome	Raffinose	BHMT	q93088
rehmannia dride rhizome	Raffinose	Snr1	q969g3
rehmannia dride rhizome	Raffinose	MAL2	q969l2
rehmannia dride rhizome	Raffinose	UPRT	q96bw1
rehmannia dride rhizome	Raffinose	CHMP4C	q96cf2
rehmannia dride rhizome	Raffinose	C3orf37	q96fz2
rehmannia dride rhizome	Raffinose	CHMP6	q96fz7
rehmannia dride rhizome	Raffinose	SNF8	q96h20
rehmannia dride rhizome	Raffinose	IMMP1L	q96lu5
rehmannia dride rhizome	Raffinose	gs3	q96s36
rehmannia dride rhizome	Raffinose	IMMP2L	q96t52
rehmannia dride rhizome	Raffinose	MM-1	q99471
rehmannia dride rhizome	Raffinose	KLHDC3	q9bq90
rehmannia dride rhizome	Raffinose	VPS25	q9brg1
rehmannia dride rhizome	Raffinose	CHMP4A	q9by43
rehmannia dride rhizome	Raffinose	GLUC	q9h227
rehmannia dride rhizome	Raffinose	CHMP4B	q9h444
rehmannia dride rhizome	Raffinose	PRDM16	q9haz2
rehmannia dride rhizome	Raffinose	MYG	q9hb07
rehmannia dride rhizome	Raffinose	ZFYVE1	q9hbf4
rehmannia dride rhizome	Raffinose	MSL2L1	q9hci7
rehmannia dride rhizome	Raffinose	UBN1	q9npg3
rehmannia dride rhizome	Raffinose	FBXO8	q9nrd0
rehmannia dride rhizome	Raffinose	CHMP5	q9nzz3
rehmannia dride rhizome	Raffinose	TNN	q9uqp3
rehmannia dride rhizome	Raffinose	VPS24	q9y3e7
rehmannia dride rhizome	Raffinose	GMPPB	q9y5p6
rehmannia dride rhizome	Raffinose	IGF2BP2	q9y6m1
rehmannia dride rhizome	beta-Sitosterol	SOAT2	o75908
rehmannia dride rhizome	beta-Sitosterol	ABCA1	o95477
rehmannia dride rhizome	beta-Sitosterol	ADA	p00813
rehmannia dride rhizome	beta-Sitosterol	APOE	p02649
rehmannia dride rhizome	beta-Sitosterol	ESR1	p03372
rehmannia dride rhizome	beta-Sitosterol	HMGCR	p04035
rehmannia dride rhizome	beta-Sitosterol	APOB	p04114
rehmannia dride rhizome	beta-Sitosterol	BB2	p05362
rehmannia dride rhizome	beta-Sitosterol	GP1B	p07359
rehmannia dride rhizome	beta-Sitosterol	PARP1	p09874
rehmannia dride rhizome	beta-Sitosterol	MCAF	p13500
rehmannia dride rhizome	beta-Sitosterol	ENSG00000116171	p22307
rehmannia dride rhizome	beta-Sitosterol	CYP7A1	p22680
rehmannia dride rhizome	beta-Sitosterol	SOAT1	p35610
rehmannia dride rhizome	beta-Sitosterol	CASP3	p42574
rehmannia dride rhizome	beta-Sitosterol	NER	p55055
rehmannia dride rhizome	beta-Sitosterol	CASP9	p55211
rehmannia dride rhizome	beta-Sitosterol	CTX	q02318
rehmannia dride rhizome	beta-Sitosterol	SREBF2	q12772
rehmannia dride rhizome	beta-Sitosterol	LXR-a	q13133
rehmannia dride rhizome	beta-Sitosterol	Erb	q92731
rehmannia dride rhizome	beta-Sitosterol	IDI2	q9bxs1
rehmannia dride rhizome	beta-Sitosterol	ABCG8	q9h221
rehmannia dride rhizome	beta-Sitosterol	ABCG5	q9h222
rehmannia dride rhizome	beta-Sitosterol	NPC1L1	q9uhc9
rehmannia dride rhizome	beta-Sitosterol	CYP8B1	q9unu6
rehmannia dride rhizome	beta-Sitosterol	ENGL-a	q9y2c4
rehmannia dride rhizome	Stigmasterol	CD5L	o43866
rehmannia dride rhizome	Stigmasterol	CYP7B1	o75881
rehmannia dride rhizome	Stigmasterol	SOAT2	o75908
rehmannia dride rhizome	Stigmasterol	ABCA1	o95477
rehmannia dride rhizome	Stigmasterol	FGF19	o95750
rehmannia dride rhizome	Stigmasterol	D6D	o95864
rehmannia dride rhizome	Stigmasterol	ADA	p00813
rehmannia dride rhizome	Stigmasterol	APOE	p02649
rehmannia dride rhizome	Stigmasterol	HMGCR	p04035
rehmannia dride rhizome	Stigmasterol	POLB	p06746
rehmannia dride rhizome	Stigmasterol	GAA	p10253
rehmannia dride rhizome	Stigmasterol	HMGA1	p17096
rehmannia dride rhizome	Stigmasterol	CYP7A1	p22680
rehmannia dride rhizome	Stigmasterol	CD68	p34810
rehmannia dride rhizome	Stigmasterol	SOAT1	p35610
rehmannia dride rhizome	Stigmasterol	FDFT1	p37268
rehmannia dride rhizome	Stigmasterol	ENSG00000147465	p49675
rehmannia dride rhizome	Stigmasterol	HSD17B4	p51659
rehmannia dride rhizome	Stigmasterol	HMGCS2	p54868
rehmannia dride rhizome	Stigmasterol	NER	p55055
rehmannia dride rhizome	Stigmasterol	EVC	p57679
rehmannia dride rhizome	Stigmasterol	HMGCS	q01581
rehmannia dride rhizome	Stigmasterol	SCAP	q12770
rehmannia dride rhizome	Stigmasterol	SREBF2	q12772
rehmannia dride rhizome	Stigmasterol	LXR-a	q13133
rehmannia dride rhizome	Stigmasterol	SQLE	q14534
rehmannia dride rhizome	Stigmasterol	LPIN1	q14693
rehmannia dride rhizome	Stigmasterol	COG2	q14746
rehmannia dride rhizome	Stigmasterol	SC4MOL	q15800
rehmannia dride rhizome	Stigmasterol	NNAT	q16517
rehmannia dride rhizome	Stigmasterol	LDM	q16850
rehmannia dride rhizome	Stigmasterol	CEP170	q5sw79
rehmannia dride rhizome	Stigmasterol	ARTN	q5t4w7
rehmannia dride rhizome	Stigmasterol	CASC1	q6tdu7
rehmannia dride rhizome	Stigmasterol	EVC2	q86uk5
rehmannia dride rhizome	Stigmasterol	OSTA	q86uw1
rehmannia dride rhizome	Stigmasterol	ENSG00000198129	q8izn7
rehmannia dride rhizome	Stigmasterol	ENSG00000187082	q8n104
rehmannia dride rhizome	Stigmasterol	p94	q8tet4
rehmannia dride rhizome	Stigmasterol	ACD	q96ap0
rehmannia dride rhizome	Stigmasterol	TRERF1	q96pn7
rehmannia dride rhizome	Stigmasterol	NR1H4	q96ri1
rehmannia dride rhizome	Stigmasterol	BBS2	q9bxc9
rehmannia dride rhizome	Stigmasterol	ABCG8	q9h221
rehmannia dride rhizome	Stigmasterol	ABCG5	q9h222
rehmannia dride rhizome	Stigmasterol	SRMS	q9h3y6
rehmannia dride rhizome	Stigmasterol	CYP39A1	q9nyl5
rehmannia dride rhizome	Stigmasterol	CALCOCO1	q9p1z2
rehmannia dride rhizome	Stigmasterol	NPC1L1	q9uhc9
rehmannia dride rhizome	Stigmasterol	CYP8B1	q9unu6
rehmannia dride rhizome	Stigmasterol	RBM16	q9upn6
rehmannia dride rhizome	Stigmasterol	NOD1	q9y239
rehmannia dride rhizome	Stigmasterol	ENGL-a	q9y2c4
rehmannia dride rhizome	Stigmasterol	ANKRD6	q9y2g4
rehmannia dride rhizome	Stigmasterol	D5D	q9y5q0
rehmannia dride rhizome	Succinic acid	FOR	a8k5i5
rehmannia dride rhizome	Succinic acid	ENSG00000108958	b4del5
rehmannia dride rhizome	Succinic acid	PDHX	o00330
rehmannia dride rhizome	Succinic acid	SDHD	o14521
rehmannia dride rhizome	Succinic acid	HSD17B6	o14756
rehmannia dride rhizome	Succinic acid	RD	o14832
rehmannia dride rhizome	Succinic acid	P4HA2	o15460
rehmannia dride rhizome	Succinic acid	LH3	o60568
rehmannia dride rhizome	Succinic acid	CS	o75390
rehmannia dride rhizome	Succinic acid	IDH1	o75874
rehmannia dride rhizome	Succinic acid	BBOX1	o75936
rehmannia dride rhizome	Succinic acid	COB	p00156
rehmannia dride rhizome	Succinic acid	LDHA	p00338
rehmannia dride rhizome	Succinic acid	GLUD1	p00367
rehmannia dride rhizome	Succinic acid	INS	p01308
rehmannia dride rhizome	Succinic acid	ENSG00000173342	p02812
rehmannia dride rhizome	Succinic acid	ND2	p03891
rehmannia dride rhizome	Succinic acid	CAT	p04040
rehmannia dride rhizome	Succinic acid	SOD2	p04179
rehmannia dride rhizome	Succinic acid	GAPDH	p04406
rehmannia dride rhizome	Succinic acid	ASL	p04424
rehmannia dride rhizome	Succinic acid	CYP11A	p05108
rehmannia dride rhizome	Succinic acid	PCCA	p05165
rehmannia dride rhizome	Succinic acid	PCCB	p05166
rehmannia dride rhizome	Succinic acid	UROD	p06132
rehmannia dride rhizome	Succinic acid	ATP5B	p06576
rehmannia dride rhizome	Succinic acid	ENSG00000166278	p06681
rehmannia dride rhizome	Succinic acid	CRH	p06850
rehmannia dride rhizome	Succinic acid	LDHB	p07195
rehmannia dride rhizome	Succinic acid	CTSD	p07339
rehmannia dride rhizome	Succinic acid	LDHC	p07864
rehmannia dride rhizome	Succinic acid	FH	p07954
rehmannia dride rhizome	Succinic acid	ABCB1	p08183
rehmannia dride rhizome	Succinic acid	PFKM	p08237
rehmannia dride rhizome	Succinic acid	CYC1	p08574
rehmannia dride rhizome	Succinic acid	DLD	p09622
rehmannia dride rhizome	Succinic acid	CSF3	p09919
rehmannia dride rhizome	Succinic acid	ENSG00000211677	p0cg04
rehmannia dride rhizome	Succinic acid	DLAT	p10515
rehmannia dride rhizome	Succinic acid	PDHB	p11177
rehmannia dride rhizome	Succinic acid	G6PD	p11413
rehmannia dride rhizome	Succinic acid	PC	p11498
rehmannia dride rhizome	Succinic acid	P4HA1	p13674
rehmannia dride rhizome	Succinic acid	PK3	p14618
rehmannia dride rhizome	Succinic acid	UQBP	p14927
rehmannia dride rhizome	Succinic acid	GLUL	p15104
rehmannia dride rhizome	Succinic acid	RAC2	p15153
rehmannia dride rhizome	Succinic acid	GPD1	p21695
rehmannia dride rhizome	Succinic acid	SDHB	p21912
rehmannia dride rhizome	Succinic acid	MUT	p22033
rehmannia dride rhizome	Succinic acid	ACAT1	p24752
rehmannia dride rhizome	Succinic acid	ATP5A1	p25705
rehmannia dride rhizome	Succinic acid	HTR1B	p28222
rehmannia dride rhizome	Succinic acid	ADSS	p30520
rehmannia dride rhizome	Succinic acid	PKLR	p30613
rehmannia dride rhizome	Succinic acid	SDHA	p31040
rehmannia dride rhizome	Succinic acid	GK	p32189
rehmannia dride rhizome	Succinic acid	SHMT1	p34896
rehmannia dride rhizome	Succinic acid	PFN2	p35080
rehmannia dride rhizome	Succinic acid	HK4	p35557
rehmannia dride rhizome	Succinic acid	G6PC	p35575
rehmannia dride rhizome	Succinic acid	DLST	p36957
rehmannia dride rhizome	Succinic acid	DCT	p40126
rehmannia dride rhizome	Succinic acid	MDH1	p40925
rehmannia dride rhizome	Succinic acid	MDH2	p40926
rehmannia dride rhizome	Succinic acid	GPD2	p43304
rehmannia dride rhizome	Succinic acid	IDH2	p48735
rehmannia dride rhizome	Succinic acid	ALDH9A1	p49189
rehmannia dride rhizome	Succinic acid	GLUD2	p49448
rehmannia dride rhizome	Succinic acid	ALDH5A1	p51649
rehmannia dride rhizome	Succinic acid	SUCLG1	p53597
rehmannia dride rhizome	Succinic acid	OXCT1	p55809
rehmannia dride rhizome	Succinic acid	ATP5J2	p56134
rehmannia dride rhizome	Succinic acid	TPI1	p60174
rehmannia dride rhizome	Succinic acid	HK1-tb	p78542
rehmannia dride rhizome	Succinic acid	ABAT	p80404
rehmannia dride rhizome	Succinic acid	CYCS	p99999
rehmannia dride rhizome	Succinic acid	DHODH	q02127
rehmannia dride rhizome	Succinic acid	BDH1	q02338
rehmannia dride rhizome	Succinic acid	PLOD1	q02809
rehmannia dride rhizome	Succinic acid	TNK2	q07912
rehmannia dride rhizome	Succinic acid	CRYZ	q08257
rehmannia dride rhizome	Succinic acid	ASPH	q12797
rehmannia dride rhizome	Succinic acid	SLC13A2	q13183
rehmannia dride rhizome	Succinic acid	SGCG	q13326
rehmannia dride rhizome	Succinic acid	NNT	q13423
rehmannia dride rhizome	Succinic acid	TCIRG1	q13488
rehmannia dride rhizome	Succinic acid	BLMH	q13867
rehmannia dride rhizome	Succinic acid	MMD	q15546
rehmannia dride rhizome	Succinic acid	P3H3	q16538
rehmannia dride rhizome	Succinic acid	SGCB	q16585
rehmannia dride rhizome	Succinic acid	MOP1	q16665
rehmannia dride rhizome	Succinic acid	DECR	q16698
rehmannia dride rhizome	Succinic acid	PCK2	q16822
rehmannia dride rhizome	Succinic acid	LEPRE1	q32p28
rehmannia dride rhizome	Succinic acid	SLC22A6	q4u2r8
rehmannia dride rhizome	Succinic acid	COQ5	q5hyk3
rehmannia dride rhizome	Succinic acid	TPT	q5t2r2
rehmannia dride rhizome	Succinic acid	ALKBH2	q6ns38
rehmannia dride rhizome	Succinic acid	SLC27A2	q6pf09
rehmannia dride rhizome	Succinic acid	LDHAL6A	q6zmr3
rehmannia dride rhizome	Succinic acid	P4HA3	q7z4n8
rehmannia dride rhizome	Succinic acid	SLC13A5	q86yt5
rehmannia dride rhizome	Succinic acid	LEPREL1	q8ivl5
rehmannia dride rhizome	Succinic acid	ADHFE1	q8iww8
rehmannia dride rhizome	Succinic acid	DAND5	q8n907
rehmannia dride rhizome	Succinic acid	ACOT4	q8n9l9
rehmannia dride rhizome	Succinic acid	CHDH	q8ne62
rehmannia dride rhizome	Succinic acid	SLC13A3	q8wwt9
rehmannia dride rhizome	Succinic acid	RIS1	q8wz71
rehmannia dride rhizome	Succinic acid	COQ2	q96h96
rehmannia dride rhizome	Succinic acid	DHTKD1	q96hy7
rehmannia dride rhizome	Succinic acid	SUCLG2	q96i99
rehmannia dride rhizome	Succinic acid	ALKBH3	q96q83
rehmannia dride rhizome	Succinic acid	YME1L1	q96ta2
rehmannia dride rhizome	Succinic acid	SDHC	q99643
rehmannia dride rhizome	Succinic acid	ACO2	q99798
rehmannia dride rhizome	Succinic acid	SUCNR1	q9bxa5
rehmannia dride rhizome	Succinic acid	OXCT2	q9byc2
rehmannia dride rhizome	Succinic acid	LDHAL6B	q9byz2
rehmannia dride rhizome	Succinic acid	NaSi-1	q9bzw2
rehmannia dride rhizome	Succinic acid	EGLN1	q9gzt9
rehmannia dride rhizome	Succinic acid	NARFL	q9h6q4
rehmannia dride rhizome	Succinic acid	ATP8A2	q9nti2
rehmannia dride rhizome	Succinic acid	TMLHE	q9nvh6
rehmannia dride rhizome	Succinic acid	SUCLA2	q9p2r7
rehmannia dride rhizome	Succinic acid	DIC	q9ubx3
rehmannia dride rhizome	Succinic acid	DPP7	q9uhl4
rehmannia dride rhizome	Succinic acid	HACL1	q9uj83
rehmannia dride rhizome	Succinic acid	OGDHL	q9uld0
rehmannia dride rhizome	Succinic acid	BCS	q9y276
rehmannia dride rhizome	Succinic acid	MTO1	q9y2z2
rehmannia dride rhizome	Succinic acid	SAMHD1	q9y3z3
rehmannia dride rhizome	Succinic acid	ENSG00000187738	q9y436
rehmannia dride rhizome	Succinic acid	DDP2	q9y5j9
rehmannia dride rhizome	Succinic acid	INSL5	q9y5q6
rehmannia dride rhizome	Stearic acid	SCD	o00767
rehmannia dride rhizome	Stearic acid	NDUFAB1	o14561
rehmannia dride rhizome	Stearic acid	AGPAT2	o15120
rehmannia dride rhizome	Stearic acid	MGAM	o43451
rehmannia dride rhizome	Stearic acid	KIF5C	o60282
rehmannia dride rhizome	Stearic acid	STX10	o60499
rehmannia dride rhizome	Stearic acid	D6D	o95864
rehmannia dride rhizome	Stearic acid	SOD1	p00441
rehmannia dride rhizome	Stearic acid	PNP	p00491
rehmannia dride rhizome	Stearic acid	GOT2	p00505
rehmannia dride rhizome	Stearic acid	A2M	p01023
rehmannia dride rhizome	Stearic acid	INS	p01308
rehmannia dride rhizome	Stearic acid	ALB	p02768
rehmannia dride rhizome	Stearic acid	CAT	p04040
rehmannia dride rhizome	Stearic acid	PLA2	p04054
rehmannia dride rhizome	Stearic acid	APOB	p04114
rehmannia dride rhizome	Stearic acid	SOD2	p04179
rehmannia dride rhizome	Stearic acid	FABP3	p05413
rehmannia dride rhizome	Stearic acid	UROD	p06132
rehmannia dride rhizome	Stearic acid	LPL	p06858
rehmannia dride rhizome	Stearic acid	FABP1	p07148
rehmannia dride rhizome	Stearic acid	F7	p08709
rehmannia dride rhizome	Stearic acid	MYB	p10242
rehmannia dride rhizome	Stearic acid	MGST1	p10620
rehmannia dride rhizome	Stearic acid	RBP3	p10745
rehmannia dride rhizome	Stearic acid	AR7	p10827
rehmannia dride rhizome	Stearic acid	EPB41	p11171
rehmannia dride rhizome	Stearic acid	CETP	p11597
rehmannia dride rhizome	Stearic acid	FABP2	p12104
rehmannia dride rhizome	Stearic acid	FABP4	p15090
rehmannia dride rhizome	Stearic acid	PNLIP	p16233
rehmannia dride rhizome	Stearic acid	GP4	p16671
rehmannia dride rhizome	Stearic acid	CR1	p17927
rehmannia dride rhizome	Stearic acid	ECGF1	p19971
rehmannia dride rhizome	Stearic acid	ALOX5AP	p20292
rehmannia dride rhizome	Stearic acid	ABCD1	p33897
rehmannia dride rhizome	Stearic acid	PCK1	p35558
rehmannia dride rhizome	Stearic acid	AHR	p35869
rehmannia dride rhizome	Stearic acid	SREBF1	p36956
rehmannia dride rhizome	Stearic acid	PPARG	p37231
rehmannia dride rhizome	Stearic acid	CTRL	p40313
rehmannia dride rhizome	Stearic acid	GNPDA1	p46926
rehmannia dride rhizome	Stearic acid	CSN1	p47710
rehmannia dride rhizome	Stearic acid	FASN	p49327
rehmannia dride rhizome	Stearic acid	ACOT2	p49753
rehmannia dride rhizome	Stearic acid	SULT1E1	p49888
rehmannia dride rhizome	Stearic acid	ACLY	p53396
rehmannia dride rhizome	Stearic acid	GPR85	p60893
rehmannia dride rhizome	Stearic acid	FA1	p80370
rehmannia dride rhizome	Stearic acid	GALK2	q01415
rehmannia dride rhizome	Stearic acid	ECRP	q12762
rehmannia dride rhizome	Stearic acid	SREBF2	q12772
rehmannia dride rhizome	Stearic acid	LXR-a	q13133
rehmannia dride rhizome	Stearic acid	PPP1R1A	q13522
rehmannia dride rhizome	Stearic acid	FLN2	q14315
rehmannia dride rhizome	Stearic acid	PCSK7	q16549
rehmannia dride rhizome	Stearic acid	ZNF74	q16587
rehmannia dride rhizome	Stearic acid	DECR	q16698
rehmannia dride rhizome	Stearic acid	PLA1A	q53h76
rehmannia dride rhizome	Stearic acid	ACBD5	q5t8e0
rehmannia dride rhizome	Stearic acid	PPRC1	q5vv67
rehmannia dride rhizome	Stearic acid	CTRB2	q6gpi1
rehmannia dride rhizome	Stearic acid	IGF2AS	q6u949
rehmannia dride rhizome	Stearic acid	STAC	q6zmt1
rehmannia dride rhizome	Stearic acid	PGAP1	q75t13
rehmannia dride rhizome	Stearic acid	SCD5	q86sk9
rehmannia dride rhizome	Stearic acid	ACOT1	q86tx2
rehmannia dride rhizome	Stearic acid	CASZ1	q86v15
rehmannia dride rhizome	Stearic acid	PPARGC1B	q86yn6
rehmannia dride rhizome	Stearic acid	PNPLA6	q8iy17
rehmannia dride rhizome	Stearic acid	LASS5	q8n5b7
rehmannia dride rhizome	Stearic acid	PLD5	q8n7p1
rehmannia dride rhizome	Stearic acid	ACOT4	q8n9l9
rehmannia dride rhizome	Stearic acid	NETO1	q8tdf5
rehmannia dride rhizome	Stearic acid	TSKU	q8wua8
rehmannia dride rhizome	Stearic acid	ENSG00000183984	q8wyr5
rehmannia dride rhizome	Stearic acid	RORB	q92753
rehmannia dride rhizome	Stearic acid	PLEKHG5	q93038
rehmannia dride rhizome	Stearic acid	PYCR2	q96c36
rehmannia dride rhizome	Stearic acid	PCQAP	q96rn5
rehmannia dride rhizome	Stearic acid	CTRC	q99895
rehmannia dride rhizome	Stearic acid	ABHD6	q9bv23
rehmannia dride rhizome	Stearic acid	SIGLEC1	q9bzz2
rehmannia dride rhizome	Stearic acid	GLUC	q9h227
rehmannia dride rhizome	Stearic acid	GPAM	q9hcl2
rehmannia dride rhizome	Stearic acid	PIGV	q9nud9
rehmannia dride rhizome	Stearic acid	DECR2	q9nui1
rehmannia dride rhizome	Stearic acid	CALCOCO1	q9p1z2
rehmannia dride rhizome	Stearic acid	XPR1	q9ubh6
rehmannia dride rhizome	Stearic acid	FRAG1	q9uhj9
rehmannia dride rhizome	Stearic acid	LPI	q9um01
rehmannia dride rhizome	Oleic acid	DLL1	o00548
rehmannia dride rhizome	Oleic acid	PEX7	o00628
rehmannia dride rhizome	Oleic acid	ACACB	o00763
rehmannia dride rhizome	Oleic acid	SCD	o00767
rehmannia dride rhizome	Oleic acid	PAP-2a	o14494
rehmannia dride rhizome	Oleic acid	PPAP2B	o14495
rehmannia dride rhizome	Oleic acid	FFAR1	o14842
rehmannia dride rhizome	Oleic acid	PLD2	o14939
rehmannia dride rhizome	Oleic acid	ACOX3	o15254
rehmannia dride rhizome	Oleic acid	ALOX15B	o15296
rehmannia dride rhizome	Oleic acid	FABP7	o15540
rehmannia dride rhizome	Oleic acid	ADCY6	o43306
rehmannia dride rhizome	Oleic acid	AQP9	o43315
rehmannia dride rhizome	Oleic acid	PAP-2c	o43688
rehmannia dride rhizome	Oleic acid	PMP34	o43808
rehmannia dride rhizome	Oleic acid	PLIN	o60240
rehmannia dride rhizome	Oleic acid	ENSG00000138031	o60266
rehmannia dride rhizome	Oleic acid	ADCY9	o60503
rehmannia dride rhizome	Oleic acid	M6PRBP1	o60664
rehmannia dride rhizome	Oleic acid	CIS6	o75159
rehmannia dride rhizome	Oleic acid	PEX14	o75381
rehmannia dride rhizome	Oleic acid	CS	o75390
rehmannia dride rhizome	Oleic acid	PPM1B	o75688
rehmannia dride rhizome	Oleic acid	DGAT1	o75907
rehmannia dride rhizome	Oleic acid	SOAT2	o75908
rehmannia dride rhizome	Oleic acid	EPM2A	o95278
rehmannia dride rhizome	Oleic acid	ABCA1	o95477
rehmannia dride rhizome	Oleic acid	ADCY5	o95622
rehmannia dride rhizome	Oleic acid	D6D	o95864
rehmannia dride rhizome	Oleic acid	LPHB	o95969
rehmannia dride rhizome	Oleic acid	CYB5A	p00167
rehmannia dride rhizome	Oleic acid	GOT2	p00505
rehmannia dride rhizome	Oleic acid	LALBA	p00709
rehmannia dride rhizome	Oleic acid	PLG	p00747
rehmannia dride rhizome	Oleic acid	PLAT	p00750
rehmannia dride rhizome	Oleic acid	FOS	p01100
rehmannia dride rhizome	Oleic acid	LDLR	p01130
rehmannia dride rhizome	Oleic acid	GCG	p01275
rehmannia dride rhizome	Oleic acid	PPY	p01298
rehmannia dride rhizome	Oleic acid	INS	p01308
rehmannia dride rhizome	Oleic acid	GAST	p01350
rehmannia dride rhizome	Oleic acid	APOA1	p02647
rehmannia dride rhizome	Oleic acid	APOE	p02649
rehmannia dride rhizome	Oleic acid	ALB	p02768
rehmannia dride rhizome	Oleic acid	GC	p02774
rehmannia dride rhizome	Oleic acid	CAT	p04040
rehmannia dride rhizome	Oleic acid	PLA2	p04054
rehmannia dride rhizome	Oleic acid	APOB	p04114
rehmannia dride rhizome	Oleic acid	EDN1	p05305
rehmannia dride rhizome	Oleic acid	FABP3	p05413
rehmannia dride rhizome	Oleic acid	CCK	p06307
rehmannia dride rhizome	Oleic acid	RB1	p06400
rehmannia dride rhizome	Oleic acid	ENSG00000166278	p06681
rehmannia dride rhizome	Oleic acid	LPL	p06858
rehmannia dride rhizome	Oleic acid	LIPF	p07098
rehmannia dride rhizome	Oleic acid	FABP1	p07148
rehmannia dride rhizome	Oleic acid	CD55	p08174
rehmannia dride rhizome	Oleic acid	PFKM	p08237
rehmannia dride rhizome	Oleic acid	CTSG	p08311
rehmannia dride rhizome	Oleic acid	ACAA1	p09110
rehmannia dride rhizome	Oleic acid	SCT	p09683
rehmannia dride rhizome	Oleic acid	PYY	p10082
rehmannia dride rhizome	Oleic acid	K60	p10145
rehmannia dride rhizome	Oleic acid	LIPC	p11150
rehmannia dride rhizome	Oleic acid	ACADM	p11310
rehmannia dride rhizome	Oleic acid	G6PD	p11413
rehmannia dride rhizome	Oleic acid	PC	p11498
rehmannia dride rhizome	Oleic acid	CETP	p11597
rehmannia dride rhizome	Oleic acid	FABP2	p12104
rehmannia dride rhizome	Oleic acid	BMP2	p12643
[truncated: 5,264 more rows]
