# Supplementary material for: dTGS: Method for Effective Components Identification from Traditional Chinese Medicine Formula and Mechanism Analysis
Source: Evid Based Complement Alternat Med. 2013 Dec 18;2013:840427. doi: 10.1155/2013/840427 (PMC3878852; doi:10.1155/2013/840427)
Supplement: Supplementary file 1 — Table S1： BHDWT network database Tables S2：19 chemical components and proteins affected by them [file 840427.f1.zip › Table S2.xls]

## Sheet: Sheet1
ID	component	protein	the mode of action	Correlation score
1	Adenosine	AA1R	activation	0.997
2	Berberine	ADIPO	activation	0.81
3	Nicotinic acid	ADIPO	activation	0.815
4	Catalpol	BCL-2	activation	0.833
5	beta-Sitosterol	CASP3	activation	0.714
6	Adenosine	CASP3	activation	0.8
7	Chrysin	CASP3	activation	0.727
8	Berberine	CASP3	activation	0.745
9	Isoliquiritigenin	CASP3	activation	0.715
10	beta-Sitosterol	CASP9	activation	0.7
11	Berberine	GLUT4	activation	0.85
12	Succinic acid	INS	activation	0.8
13	linoleic acid	INS	activation	0.943
14	Lauric acid	INS	activation	0.831
15	linoleic acid	JNK	activation	0.8
16	Mannitol	NFκB	activation	0.8
17	Adenosine	NGF	activation	0.818
18	Wogonin	P53	activation	0.82
19	Mannitol	PKCξ	activation	0.198
20	Berberine	PPARα	activation	0.81
21	linoleic acid	PPARα	activation	0.995
22	Mangiferin	PPARα	activation	0.72
23	Adenosine	PYG	activation	0.892
24	Adenosine	SUR2A	activation	0.937
25	Wogonin	TNFa	activation	0.83
26	Wogonin	TNFa	inhibition	0.83
27	Mannitol	α-MSH	activation	0.804
28	Mannitol	αPKC	activation	0.198
29	Berberine	INSR	activaton	0.811
30	linoleic acid	LEP	inhibition	0.878
31	linoleic acid	ADIPO	inhibition	0.84
32	Baicalein	BAX	inhibition	0.916
33	Berberine	BCL-2	inhibition	0.923
34	Acteoside	CASP3	inhibition	0.819
35	Adenosine	CASP3	inhibition	0.8
36	Scutellarin	CASP3	inhibition	0.821
37	Ferulic acid	ERK	inhibition	0.752
38	Adenosine	INS	inhibition	0.818
39	Phenylacetic acid	INS	inhibition	0.81
40	Nicotinic acid	INS	inhibition	0.948
41	Rutin	INSR	inhibition	0.8
42	Chrysin	JNK	inhibition	0.814
43	Chrysin	NFκB	inhibition	0.839
44	Berberine	TNFa	inhibition	0.817
45	Adenosine	α-MSH	inhibition	0.98
46	Adenosine	AA1R	activation	0.997
